1 **Cytosolic EZH2-IMPDH2 complex regulates melanoma progression and**  
2 **metastasis via GTP regulation**

3

4 **Highlights**

5

6 • EZH2 has non-canonical methyltransferase-independent and GTP-dependent  
7 tumorigenic and metastatic functions in melanoma.

8 • The N-terminal EED-binding domain of EZH2 interacts with the CBS domain of  
9 IMPDH2 in a polycomb repressive complex 2- (PRC2-) and methylation-  
10 independent manner.

11 • EZH2 accumulates with IMPDH2 in the cytoplasm and increases IMPDH2's  
12 tetramerization-mediated activity independently of EZH2 methyltransferase.

13 • EZH2 upregulates GTP synthesis by IMPDH2 activation and thereby activates  
14 ribosome biogenesis via rRNA synthesis and actomyosin contractility via RhoA  
15 GTPase.

16 • Sappanone A (SA) inhibits IMPDH2-EZH2 interactions and is anti-proliferative  
17 across a range of cancers including melanoma, but not in normal cells.

18

19 **Graphical Abstract**

20

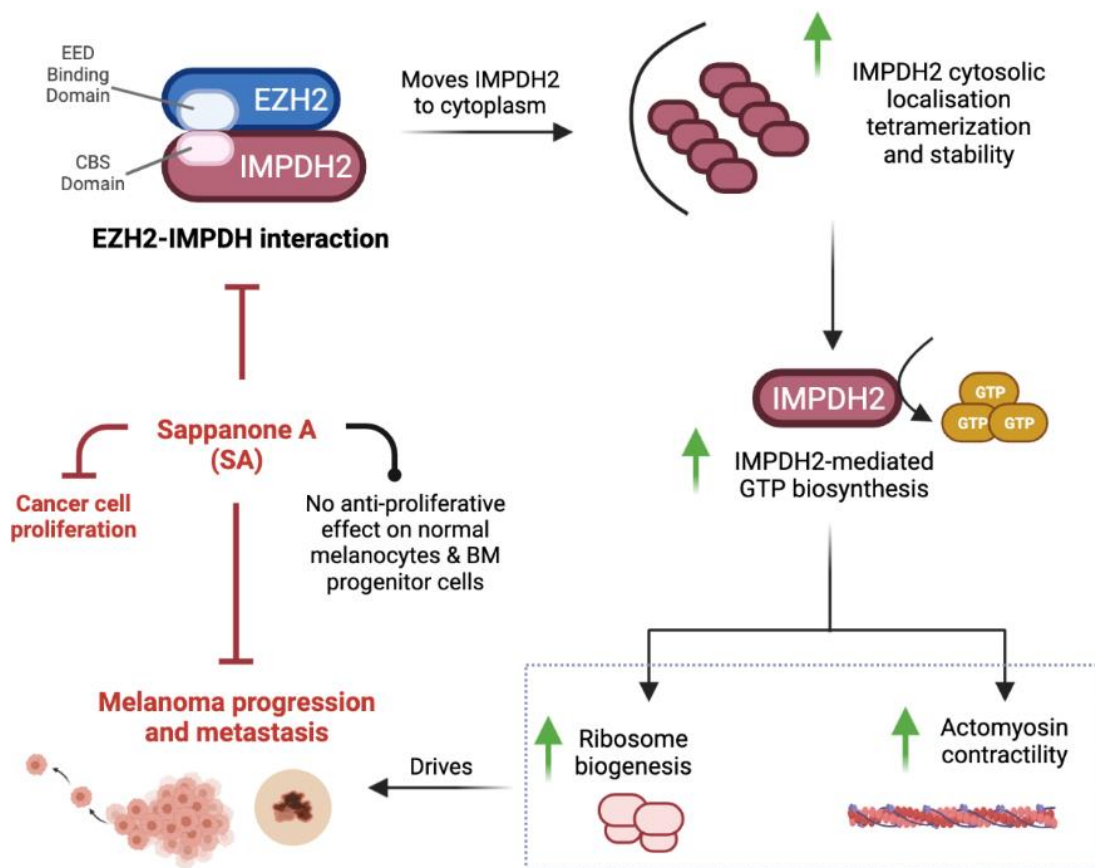

21

22

23 **ABSTRACT**

24 The enhancer of zeste homolog 2 (EZH2) oncoprotein is a histone methyltransferase  
25 that functions canonically as a catalytic subunit of the polycomb repressive complex 2  
26 (PRC2) to tri-methylate histone H3 at Lys 27 (H3K27me3). Although targeting EZH2  
27 methyltransferase is a promising therapeutic strategy against cancer,  
28 methyltransferase-independent oncogenic functions of EZH2 are described.  
29 Moreover, pharmacological EZH2 methyltransferase inhibition was only variably  
30 effective in pre-clinical and clinical studies, suggesting that targeting EZH2  
31 methyltransferase alone may be insufficient. Here, we demonstrate a non-canonical  
32 mechanism of EZH2's oncogenic activity characterized by interactions with inosine  
33 monophosphate dehydrogenase 2 (IMPDH2) and downstream promotion of  
34 guanosine-5'-triphosphate (GTP) production. EZH2-IMPDH2 interactions identified by  
35 Liquid Chromatography-Mass Spectrometry (LC-MS) of EZH2 immunoprecipitates

36 from melanoma cells were verified to occur between the N-terminal EED-binding  
37 domain of cytosolic EZH2 and the CBS domain of IMPDH2 in a methyltransferase-  
38 independent manner. EZH2 silencing reduced cellular GTP, ribosome biogenesis,  
39 RhoA-mediated actomyosin contractility and melanoma cell proliferation and invasion  
40 by impeding the activity of IMPDH2. Guanosine, which replenishes GTP, reversed  
41 these effects and thereby promoted invasive and clonogenic cell states even in EZH2  
42 silenced cells. IMPDH2 silencing antagonized the proliferative and invasive effects of  
43 EZH2, also in a guanosine-reversible manner. In human melanomas, high cytosolic  
44 EZH2 and IMPDH2 expression were associated with nucleolar enlargement, a marker  
45 of ribosome biogenesis. EZH2-IMPDH2 complexes were also observed in a range of  
46 cancers in which Sappanone A (SA), which inhibits EZH2-IMPDH2 interactions, was  
47 anti-tumorigenic, although notably non-toxic in normal cells. These findings illuminate  
48 a previously unrecognized, non-canonical, methyltransferase-independent, and GTP-  
49 dependent mechanism by which EZH2 regulates tumorigenicity in melanoma and  
50 other cancers, opening new avenues for development of anti-EZH2 therapeutics.

51

52 **Keywords:** EZH2, IMPDH2, melanoma, Sappanone A, ribosome biogenesis,  
53 actomyosin contractility, GTP metabolism

54

## 55 INTRODUCTION

56

57 Neoplastic cells, including melanoma, are highly dependent on *de novo*  
58 biosynthesis of purine nucleotides<sup>1</sup>. For example, the activity of Rho-GTPases in  
59 melanoma cells, and thereby formation of the actomyosin cytoskeleton which  
60 promotes cell migration and invasion, is regulated by intracellular GTP<sup>2,3,4</sup>. Consistent  
61 with this, cellular GTP levels, critical for purine nucleotide synthesis, are significantly  
62 higher in melanoma cells compared to their normal cell counterparts, melanocytes<sup>2</sup>.

63

64 Increased rRNA synthesis<sup>5</sup> and nucleolar hypertrophy<sup>6</sup> have long been recognized  
65 as features of malignant transformation. The requirement of GTP for Pol I transcription  
66 and nucleolar hypertrophy has been shown recently in glioblastoma<sup>7</sup>, and nucleolar  
67 hypertrophy has been associated with thicker and more mitotically active melanomas<sup>8</sup>.  
68 Selective inhibition of rRNA synthesis using the RNA polymerase I inhibitor CX-5461  
69 decreased melanoma tumorigenicity *in vitro* and *in vivo*<sup>9</sup>.

70

71 Inosine monophosphate dehydrogenase 2 (IMPDH2), an oncoprotein in various  
72 cancers<sup>10</sup>, is a key rate-limiting enzyme in nucleotide synthesis. It maintains GTP  
73 levels needed for nucleic acid synthesis, protein production via ribosome biogenesis,  
74 and molecular signaling through guanine nucleotide-binding proteins (G-proteins) that  
75 regulate cell functions such as cytoskeletal rearrangement, membrane trafficking, and  
76 signal transduction<sup>11</sup>. IMPDH2 is regulated transcriptionally, post-translationally, and  
77 allosterically<sup>12</sup>, and tetramerization is essential for its activity<sup>13,14</sup>. It contains two major  
78 domains: a catalytic domain for substrate interactions and the Bateman domain (CBS),  
79 which is not required for catalytic activity but exerts allosteric autoregulatory  
80 effects<sup>13,15,16</sup>. A naturally occurring compound, Sappanone A (SA), demonstrated  
81 inhibitory effects on neuroinflammation by directly targeting the conserved cysteine  
82 residue 140 (Cys140) in the CBS domain of IMPDH2. Interestingly, SA selectively  
83 targets and inactivates IMPDH2 but not the IMPDH1 isoform, potentially minimizing  
84 lymphotoxic effects of non-specific IMPDH family targeting<sup>16</sup>. IMPDH2 is  
85 overexpressed in melanoma cell lines compared to melanocytes<sup>17,18</sup>, and depletion of  
86 GTP via IMPDH2 inhibition with MPA induced melanocytic differentiation in melanoma  
87 cells<sup>19</sup>.

88

89 Enhancer of zeste homolog 2 (EZH2), a component of Polycomb Repressor  
90 Complex 2 (PRC2), catalyzes tri-methylation of histone H3 at lysine 27 (H3K27me3)  
91 to regulate gene expression<sup>20-22</sup>. It has critical roles in the progression of numerous  
92 malignancies<sup>23</sup>, including melanoma<sup>24-28</sup>, where EZH2 activation represses tumor  
93 suppressor genes associated with cell differentiation, cell cycle inhibition, repression  
94 of metastasis, and antigen processing and presentation pathways<sup>27-30</sup>. EZH2  
95 methyltransferase inhibitors have anti-cancer activity preclinically<sup>31,32</sup> and in patients  
96 <sup>31,33</sup>, albeit with notable toxicity.

97

98 Additional to EZH2's methyltransferase activity, it also regulates gene transcription  
99 in a PRC2- and methylation-independent manner. This limits the therapeutic potential  
100 of specific EZH2 methyltransferase targeting<sup>34</sup>; compounds that degrade total EZH2  
101 protein or that target methyltransferase-independent mechanisms of EZH2 might be  
102 required to avail context-dependent therapeutic potentials of EZH2 targeting.

103

104 We recently demonstrated that EZH2 is a negative regulator of melanocytic  
105 differentiation (pigmentation), whose suppression by knockdown or degraders  
106 decreased melanoma cell clonogenicity and invasion, and induced melanocytic  
107 differentiation<sup>35</sup>. In contrast, conventional EZH2 methyltransferase inhibitors displayed  
108 only minimal anti-melanoma efficacy *in vitro*<sup>35</sup>. These data further suggested  
109 methyltransferase-independent, non-catalytic functions of EZH2 in melanoma  
110 tumorigenesis and invasion, prompting us to look for novel EZH2 interactions.

111

112 Although EZH2 is mainly intranuclear, some studies have shown its cytosolic  
113 localization in fibroblasts, T lymphocytes, breast cancer, and prostate cancer cells<sup>36-</sup>  
114 <sup>39</sup>. Cytoplasmic functions of EZH2 are largely unknown, as most studies have focused  
115 on its nuclear functions. EZH2 is known to promote cancer progression by facilitating  
116 glucose, lipid, and amino acid metabolism<sup>40,41</sup>, but other mechanisms of action are  
117 likely.

118

119 Here, we identify a previously unrecognized methyltransferase-independent role of  
120 EZH2 in melanoma tumorigenesis and invasion. We found that cytosolic EZH2  
121 contributes to rRNA metabolism and Rho GTPase activity by regulating cytosolic  
122 IMPDH2 tetramerization-mediated activity and, in turn, promoting GTP production in  
123 melanoma cells. Sappanone A (SA) inhibited interactions between EZH2 and the  
124 IMPDH2 CBS domain and was anti-clonogenic in melanoma and a range of other  
125 cancer types, but not in normal cells. These findings suggest novel avenues for  
126 improved anti-EZH2 therapeutics.

127

## 128 **MATERIALS AND METHODS**

129

### 130 **Mice**

131 All animal experiments were performed in accordance with the Alfred Research  
132 Alliance Animal Ethics Committee protocols #E/1792/2018/M. All mice used in this  
133 study were supplied by and housed in AMREP Animal Services. Eight-week-old  
134 female NOD SCID. IL2R<sup>-/-</sup> Mice (NSG) mice were used for subcutaneous injection of  
135 pLV empty vector, shEZH2-3'UTR, shEZH2+EZH2-WT or shEZH2+ EZH2-H689A  
136 containing A375 melanoma cells (1x10<sup>4</sup> cells mixed with 50 ul GFR-Matrigel, n=8 mice

137 per group). Tumours were measured with callipers weekly, and all mice were  
138 sacrificed once the first tumour reached 20mm in diameter.

139

#### 140 **Human Patient Samples**

141 All human tissue related experiments, including human melanoma tissue FFPE  
142 samples, isolated primary human melanocytes and bone marrow samples were  
143 performed in accordance with the Alfred Human Research Ethics Committee protocols  
144 #155/18 and #29/05.

145

146 62 human melanoma tumor tissue sections ranging from grade I to IV were obtained  
147 from Melanoma Research Victoria (MRV) under the guidelines approved by the  
148 Victorian Government through the Victorian Cancer Agency Translational Research  
149 Program. MRV obtained the informed consent from all participants.

150

#### 151 **Cell lines and primary cells**

152 The HEK293, C32, SK-MEL28, IGR39, A375, B16-F10 and IGR37 cell lines were  
153 obtained from ATCC and cultured under conditions specified by the manufacturer.  
154 C006-M1 cell line was from QIMR Berghofer Medical Research Institute. LM-MEL28,  
155 LM-MEL33, LM-MEL43, LM-MEL45 were from Ludwig Institute for Cancer  
156 Research<sup>42</sup>. LM-MEL28: B4:F3 is the monoclonal line derived from LM-MEL28 cells in  
157 our lab previously. MCF7 and MDA-MB-231 cell lines were provided by Prof Jane  
158 Visvader (WEHI), OVCAR3, OVCAR8 cell lines were kindly provided by Prof David  
159 Bowtell (Peter MacCallum Cancer Centre), PC3, LNCaP, C4-2 cell lines by A Prof  
160 Renea A. Taylor (Monash Biomedicine Discovery Institute), OMM1 was kindly  
161 provided by Prof Bruce R. Ksander (Harvard Medical School) and 92.1 cell line by Prof  
162 Martine Jager (Leiden University Medical Centre). Mycoplasma tests were routinely  
163 performed in our laboratory and short tandem repeat (STR) profiling was conducted  
164 by the Australian Genome Research Facility (AGRF) to authenticate the human cell  
165 lines.

166

#### 167 **Chemicals**

168 The chemicals used for treating cells were GSK126 (Selleckchem, S7061), EPZ6438  
169 (Selleckchem, S7128), Sappanone A (Cayman Chemicals, 23205), MPA

170 (Selleckchem, S2487), Ribavirin (Selleckchem, S2504), DZNep (Sigma, S804983)  
171 and MS1943 (MedChemExpress, HY-133129); all are listed in Table S1.

172

### 173 **Plasmids, Cloning, Overexpression, and siRNA**

174 pCMVHA hEZH2 (#24230) and pLV-EF1a-V5-LIC (#120247) plasmids were  
175 purchased from Addgene and MYC/FLAG-hIMP2DH2 (#RC202977) plasmid from  
176 Origene. EZH2 (1-170), EZH2 (1-340), EZH2 (1-503), EZH2 (1-605), EZH2 (171-751)  
177 deletion mutants, full length EZH2 (1-751) and IMP2DH2 (1-187) deletion mutant was  
178 cloned into pLV-EF1a-V5-LIC vector backbone's SrfI/NotI RE using the cloning  
179 primers listed in Table S1. pCMVHA hEZH2 and V5-EZH2 vector was used to  
180 generate EZH2-H689A mutant vector using the mutagenesis primers listed in Table  
181 S1 with QuikChange II site-directed mutagenesis kit (Agilent) following the  
182 manufacturer's instructions. Custom designed siRNA oligonucleotides listed in Table  
183 S1 were purchased from Bioneer Pacific. For transient transfection,  $25 \times 10^4$  cells were  
184 transfected with 2.5  $\mu$ g of DNA using Lipofectamine 3000 transfection reagent  
185 (Invitrogen). For siRNA experiments,  $25 \times 10^4$  cells were transfected with 10 nM of the  
186 indicated oligonucleotides in Table S1 using the Lipofectamine RNAiMAX transfection  
187 reagent (Invitrogen). 72 hours after siRNA transfection, cells were used for functional  
188 assays or collected for western blot analysis.

189

190 Virus-containing supernatant was collected 48 hours after co-transfection of pCMV-  
191 VSV-G, psPAX2, pMD2.G and the EZH2 vectors into HEK293 cells, and then added  
192 to the target cells. Stable knockdown and rescue of EZH2 was achieved by lentiviral  
193 transduction of EZH2 with V5-EZH2-WT or V5-EZH2-H689A. After transduction, cells  
194 were selected for antibiotic resistance with 2  $\mu$ g/mL puromycin (Sigma Aldrich,  
195 #P8833), followed by knockdown using stable short hairpin interfering RNA (MISSION  
196 shRNA, Sigma Aldrich) targeting the 3'UTR of human EZH2 (TRCN0000286227), as  
197 previously reported<sup>38</sup>.

198

### 199 **GST pull-down Assay**

200 GST pull-down assay was performed as previously described<sup>43</sup> with minor  
201 modifications. The plasmid GST-EZH2 (1-170), -EZH2 (1-340), -EZH2 (1-503), or –  
202 EZH2 (1-605) or GST only was expressed in BL-21 bacteria in the presence of 0.5mM  
203 IPTG for 2.5 h at 37°C. Bacterially expressed GST only (control) or each GST–EZH2



204 mutant peptide were solubilized in NETN buffer (1% NP-40, 20mM Tris-HCl, pH 8.0,  
205 100mM NaCl, 1mM EDTA) and sonicated in 30 second bursts followed by 30 seconds  
206 rest for 15 cycles. Then they were purified by affinity chromatography on Glutathione  
207 Magnetic Agarose Beads (Pierce, Thermo Fischer)) and stored in PBS at 4°C until  
208 use. For GST-pull-down assays, purified GST control or GST-EZH2 mutant peptides  
209 were mixed with total lysates isolated from HEK293 cells, overexpressing V5-IMPDH2-  
210 CBS, grown in serum-fed condition and then incubated for 2 h at 4°C with constant  
211 rotation. The lysates from HEK293 cells were used as a source of IMPDH2-CBS  
212 domain. After extensive washing of unbound proteins, bound protein was eluted and  
213 analyzed by sodium dodecyl-PAGE (SDS-PAGE).

214

### 215 **Coimmunoprecipitation and HA/ FLAG pulldown assays**

216 Pellets of  $1 \times 10^7$  cells were lysed with 1mL Co-IP Lysis Buffer (300mM NaCl, 50mM  
217 Tris HCL pH7.4, 0.5% NP40, 0.1% Sodium deoxycholate, 2% SDS) with PhosSTOP  
218 (Roche) and cOmplete (Roche) rolled at 4°C for one hour. DynaBeads™ Protein G  
219 (Thermofisher) were washed three times with Co-IP lysis buffer and chilled in  
220 preparation. Lysates were centrifuged at 15,000 RPM for 15 minutes at 4°C and the  
221 supernatant was collected, pre-cleared with 20µL of prewashed DynaBeads and  
222 incubated on a roller for 1 hour at 4°C. Lysates had pre-cleared beads removed and  
223 were split with 500µL for IgG control and 500µL for EZH2 sample, topped to 1 mL with  
224 Co-IP lysis Buffer. These were incubated overnight at 4°C with 1:1250 of Rabbit (DAIE)  
225 mAB IgG Isotype control or 1:300 of anti-EZH2 (D2C9) XP Rabbit antibody,  
226 respectively. After 16 hours of incubation, 35µL of pre-washed DynaBeads were  
227 added to IgG control or EZH2 sample and returned to the roller for 2-4 hours incubation  
228 at 4°C. Beads were washed with Co-IP buffer once, and then buffers of increasing salt  
229 concentrations (Buffer 1, 50mM Tris, pH8.0, 150mM NaCl; Buffer 2, 50mM Tris, pH8.0,  
230 450mM NaCl; and buffer 3, 1M Tris, pH8.0). For Mass Spectrometry, proteins were  
231 eluted by resuspending in 150µL of 0.2M Glycine, pH2.5, for 5 minutes on ice and  
232 collecting supernatant, which was repeated twice. To the 450 µL of sample, 100 µL of  
233 1M Tris-HCl (pH8.0) was added and the samples were kept at -80°C until LC-MS  
234 analysis. For CoIP-WB analysis beads were washed three times with Co-IP Lysis  
235 Buffer.

236



237 For HA pulldown assays the cells were lysed with 500  $\mu$ L of IP Lysis Buffer containing  
238 cOmplete (Roche) protease inhibitor cocktail and incubated at 4°C for 35 min on a  
239 rotator followed by centrifugation at 15000 rpm for 15 min at 4°C. 50  $\mu$ L of the lysates  
240 were kept for inputs. 25  $\mu$ L of Pierce anti-HA magnetic beads (Thermo Fischer  
241 Scientific) were added onto the lysate and incubated at RT for 30 minutes on a rotator.  
242 Beads were washed with 300  $\mu$ L of TBST three times and the beads were boiled in 2x  
243 SDS-Laemmli Sample Buffer for 10 minutes.

244

#### 245 **Western blot**

246 Total proteins were extracted from cell lines and tumor xenografts in ice-cold lysis  
247 buffer (10mM Tris HCL pH8.0 1mM EDTA 1% TritonX100 0.1% Sodium Deoxycholate  
248 2% SDS 140mM NaCl, protease inhibitors and phosphatase inhibitors). Lysates were  
249 prepared after incubation on ice for 1h and centrifugation for 15 minutes cold at 15,000  
250 rpm. Supernatants were boiled in 6x SDS-Laemmli Sample Buffer for 10 minutes.  
251 Proteins were run on 4–20% Mini-PROTEAN TGX Stain-Free Protein Gels (BioRad,  
252 4568096) and then transferred to PVDF membrane by wet transfer system.  
253 Membranes were blocked with PBS containing 0.1% Tween-20 and 5% (w/v) skim  
254 milk, followed by incubation with the antibodies listed in Table S1. Signals were  
255 detected using Clarity ECL Western blotting Substrate (BioRad). Where applicable,  
256 signal intensities were quantified by ImageJ densitometry analysis software.

257

#### 258 **Non-reducing SDS-PAGE**

259 Samples were lysed in 2x Laemmli Sample Buffer without SDS and DTT and run with  
260 SDS free running buffer.

261

#### 262 **DSS Crosslinking**

263  $1 \times 10^6$  cells were precipitated and washed once with 1xPBS. The cell pellet was  
264 resuspended in 500  $\mu$ L of 1xPBS. Cell suspensions were treated with either DMSO  
265 (control) or 1mM DSS (A39267, Thermo Fisher) and incubated for 30min at RT. Then,  
266 the cells were quenched with 50mM Tris-HCl pH:8.0 by incubating for 15min at RT.  
267 Finally, the cells were centrifuged, and the cell pellets were boiled in 50  $\mu$ L of 2x SDS-  
268 Laemmli Sample Buffer for 10 min at 95°C.

269

#### 270 **Cytoplasmic and nuclear fractionation**

271 Cytoplasmic and nuclear extracts were isolated using a nuclear extraction kit  
272 according to the manufacturer's protocol (Affymetrix; Santa Clara, CA) with  
273 modifications<sup>43</sup>. Co-IP was performed with anti-EZH2 or anti-IMPDH2 antibody at 4°C  
274 as described in the Co-IP method section. The immune complexes were collected with  
275 Protein G-Dynabeads (Thermo Fischer) and washed in lysis buffer. Bound proteins  
276 were analyzed by SDS-PAGE and WBs.

277

### 278 **RNA isolation and quantitative PCR**

279 Total RNA from cells was extracted using Purelink RNA mini isolation kit according to  
280 the manufacturer's instructions (Thermo Fischer Scientific) with the additional Purelink  
281 On-Column DNA purification (ThermoFisher Scientific) step. Complementary DNA  
282 (cDNA) was synthesized using total RNA (1 µg per reaction) with SuperScript Vilo  
283 cDNA synthesis kit (Thermo Fisher Scientific) as per manufacturer's protocol.  
284 Quantitative PCR (qPCR) was carried out using Fast SYBR Green Master Mix  
285 (Invitrogen) and LightCycler 480 Instrument II (Roche). RNA expression changes were  
286 determined using a  $\Delta\Delta C_t$  method<sup>44</sup>. RPLP0 mRNA was used as an internal control in  
287 all qPCR reactions. Table S1 shows the qPCR primers used for IMPDH2, pre-rRNA,  
288 pre-tRNA, pre-GAPDH, p53, CDKN1A, CDKN2A, MDM2, PUMA and RPLP0 mRNA  
289 amplifications.

290

### 291 **Cell Proliferation, Clonogenicity and Sphere Formation Assay**

292 To measure cell proliferation rates, we plated equal numbers of cells in 6-well plates.  
293 Cells were trypsinized and counted on the indicated days by haemocytometer after  
294 trypan blue staining.

295

296 For clonogenicity assay, cells were fixed with ice-cold absolute methanol for 20 min  
297 and air-dried for 15 minutes. Cells were stained with 0.5% Crystal Violet for 20 min at  
298 room temperature and then rinsed with tap water to remove excess dye. Five random  
299 fields of stained cells were imaged using bright field microscopy at 40 × magnification  
300 and average cell numbers per field were plotted as a function of time.

301

302 Sphere formation assays were performed as described<sup>43</sup>. Briefly, cells (500 cells per  
303 well) suspended in 100 µL ice-cold Matrigel in RPMI medium (1:1 ratio) were overlaid  
304 onto the pre-solidified 50% Matrigel in 24-well plates (100 µL per well). Cells were fed

305 with 500 mL RPMI medium containing 10% FBS and grown for 14 days with a change  
306 of medium every 3 days. For the SA study, A375 and B16-F10 cells (500 cells/well)  
307 were grown on Matrigel and treated either with DMSO (vehicle) or SA in serum-fed  
308 conditions for the indicated days. Spheres were imaged and then manually quantified.

309

### 310 **Cell senescence $\beta$ -Gal assay**

311 Cells were fixed and stained with Senescence  $\beta$ -Galactosidase Staining Kit (CST  
312 #9860) following the manufacturer's instructions and imaged on a Leica DMIL LED  
313 microscope under bright field settings.

314

### 315 **3D Matrigel Invasion and Wound Healing Assays**

316 Cells ( $1 \times 10^5$  cells per well) were seeded in a 24-well Boyden chamber with an 8-mm  
317 filter coated with 20% growth factor reduced Matrigel. Cells were grown in RPMI  
318 medium containing 10% FBS for 16, 24 and 48 h at  $37^\circ \text{C}$  with 5%  $\text{CO}_2$ . Cells  
319 on the inner side of the chamber were gently removed by scraping with a wet cotton  
320 swab. Invaded cells at the outer side of the chamber were fixed with 4% formaldehyde  
321 for 30 min at RT and rinsed twice with PBS. Cells were stained with 0.5% Crystal  
322 Violet for 20 min at RT and then rinsed with tap water to remove excess dye.  
323 Analysis was performed based on the average number of stained cells per field from f  
324 ive random fields at 20x magnification on a Leica DMIL LED microscope .

325 Wound healing assays were performed by seeding cells in complete media on a 24-  
326 well plate for 24–48 h until a confluent monolayer had formed. Linear scratches were  
327 made using a sterile 200  $\mu\text{l}$  pipette tip. Monolayers were washed three times with  
328 PBS to remove detached cells, and then complete media was added. Images of  
329 the wound were taken immediately and 24h following wound formation on  
330 a Leica DMIL LED microscope under the phase contrast setting . Wound area was  
331 measured over time using ImageJ.

332

### 333 **RhoA activity assay**

334 RhoA activities were measured in melanoma cells using RhoA G-LISA activation  
335 assay kit according to the manufacturer's protocol. Briefly, cells were lysed in ice-cold  
336 lysis buffer and quickly cleared by centrifugation. Precision Red Advanced Protein  
337 Assay Reagent (Part # GL50) was used to quantify protein contents. Equal amounts  
338 of proteins were loaded onto ELISA plates. After several antibody incubation and

339 washing steps the active RhoA bound protein levels were evaluated colorimetrically  
340 by OD490 nm absorbance measurement.

341

### 342 **IMPDH2 activity assay**

343 IMPDH2 activity was measured by monitoring the reduction of NAD<sup>+</sup> to NADH and the  
344 subsequent increase in absorbance at 340 nm in buffer: 100 mM Tris-HCl, 100 mM  
345 KCl, 2 mM DTT pH 7.4. 2 µg of recombinant IMPDH2 protein was preincubated with  
346 3 mM IMP and 2 µg of recombinant EZH2 and then with 10 mM GTP for an additional  
347 10 min before the reaction was initiated by the addition of 1 mM NAD<sup>+</sup>. NADH  
348 production was measured 1 h after incubation in a FLUOstar Omega plate reader by  
349 OD340 nm absorbance.

350

### 351 **Histochemical and immunostaining**

352 H&E staining was done to evaluate nucleolar sizes<sup>5</sup>. For Fontana Masson staining,  
353 cells were sorted onto slides were fixed with 4% PFA for 20 minutes and washed twice  
354 with distilled water for 5 minutes. Then slides were incubated in Fontana silver nitrate  
355 working solution (2.5% Silver nitrate, 1% ammonium hydroxide) at 60°C for 2 hours.  
356 Slides were rinsed in water three times and incubated with 0.2% gold chloride solution  
357 (Sigma-Aldrich) for 2 minutes. Rinsed slides were incubated with 5% sodium  
358 thiosulfate for 2 minutes. After rinsing with water twice, slides were counterstained with  
359 10 µg/mL DAPI solution for 5 minutes. Slides were rinsed and mounted with  
360 fluorescence mounting medium (Dako). For Schmorl's staining, samples were  
361 dewaxed with 3 x 5-minute histolene washes, and rehydrated in washes of 100%, then  
362 95% and then 75% ethanol for 5 minutes each. Slides were washed with distilled water  
363 and placed in Schmorl's Stain for 10 minutes. Slides were washed with water for 1  
364 minute, placed in Eosin in water for 15 seconds, and returned to constant washing  
365 with water for 3 minutes. The slides were finished with 4 x 2-minute washes of 100%  
366 ethanol and 3 x 2-minute washes of Histolene. Slides were mounted with DPX  
367 Mounting Medium (Thermo Fisher Scientific).

368

369 For melanoma patient sample IHC, slides were incubated at 60°C for 1h, dewaxed in  
370 histolene, and hydrated through graded alcohols and distilled water. Sections were  
371 subjected to antigen retrieval in Antigen Retrieval solution (Dako, pH6 for EZH2,  
372 IMPDH2 antibody) at 125° for 3 minutes heated by a pressure cooker. Primary

373 antibody listed in Table S1 was diluted into blocking buffer and slides were incubated  
374 overnight at 4°C. After washing with TBST, the slides were incubated with secondary  
375 antibody using an ImmPRESS™ HRP Anti-Mouse IgG (Peroxidase) Polymer  
376 Detection Kit (Vector Laboratories) for 60 min at RT. Sections were washed with TBST  
377 and slides were developed by adding AEC+ High Sensitivity Substrate Chromogen  
378 Ready to use (Dako K346111-2).

379  
380 For immunofluorescence, cells were fixed with 4% PFA diluted in PBS for 15 min at  
381 RT, rinsed three times with PBS, and blocked for 1h using blocking buffer (5% normal  
382 donkey serum containing 0.3% Triton X-100 in PBS). After blocking, slides were  
383 incubated with primary antibody (Table S1) diluted in antibody buffer (5% bovine  
384 serum albumin containing 0.3% Triton X100 in PBS) at 4 °C overnight. Slides were  
385 washed three times with PBS and incubated with fluorescent secondary antibodies  
386 indicated in Table S1. Slides were washed three times with PBS, stained with 10µg/ml  
387 DAPI and coverslipped using Fluorescence Mounting Medium (Dako). Slides were  
388 imaged using Leica DMIL LED inverted fluorescent microscope or Nikon A1r Plus si  
389 confocal microscope.

390

### 391 **Proximity ligation assays**

392 Cells were seeded on round coverslips. After 24 h of seeding, cells were fixed with 4%  
393 PFA for 15 min at RT, rinsed three times with PBS, and blocked for 1 h using blocking  
394 buffer (5% normal goat serum containing 0.3% Triton X-100 in PBS). After blocking,  
395 slides were incubated with primary antibody diluted in antibody buffer (5% bovine  
396 serum albumin containing 0.3% Triton X-100 in PBS) at 4°C overnight. Slides were  
397 then washed three times with PBS and incubated with DuoLink PLA probes (Sigma,  
398 Cat #DUO92101). The protocol for PLA secondary antibody incubation, ligation,  
399 amplification, and washes were performed following the manufacturer's protocol.  
400 Slides were imaged using a Nikon A1r Plus confocal microscope. Positive signals were  
401 normalized to single-primary antibody control (EZH2 or IMPDH2) and image analysis  
402 was performed using ImageJ.

403

### 404 **PDX Tumor Dissociation**

405 Mice were euthanized with CO<sub>2</sub> and tumors were resected. Tumors were manually  
406 dissociated in Hank's Balanced Salt Solution (without Ca<sup>2+</sup> and Mg<sup>2+</sup>, HBSS-/-),

407 followed by enzymatic tumour dissociation using the gentleMACS tissue dissociator in  
408 Tissue Dissociating media (200 u/mL Collagenase IV, 5 mM CaCl<sub>2</sub> in HBSS -/-). Tissue  
409 was washed with HBSS-/- and pelleted at 220g for 4 minutes at 4°C, and the  
410 supernatant was removed. After this, the pellet was resuspended with 100units/g of  
411 DNase and 5mL/g of warmed trypsinEDTA and incubated at 37°C for 2 minutes. Equal  
412 volumes of cold staining media were added, and the samples were pelleted at 220g  
413 for 4 minutes at 4°C. Supernatant was removed and the pellets were resuspended in  
414 cold staining media and filtered with a 40-micron cell strainer. To separate the tumoral  
415 cells from mouse stroma, cells were stained with an antibody cocktail of directly  
416 conjugated antibodies to mouseCD31 (endothelial cells), mouse CD45 (white blood  
417 cells), mouse TER119 (red blood cells) and human HLA-A/B antibody in staining media  
418 on ice for 30 minutes. Labelled cells were resuspended in 2µg/ml DAPI in staining  
419 media with 10% FBS and 10uL/mL of DNase. Cells were subsequently analyzed  
420 and/or sorted on a FACSFusion (Becton Dickinson).

421

#### 422 **CD34+ bone marrow progenitor cell isolation and culturing**

423 Donor CD34+ HSPC samples were obtained from normal patients after informed  
424 consent in accordance with guidelines approved by The Alfred Health human research  
425 ethics committee. Cells from a leukapheresis sample were isolated using Ficoll-Paque  
426 PLUS (GE Healthcare) and density centrifugation, followed by NH<sub>4</sub>Cl lysis to remove  
427 red blood cells. A secondary isolation step was completed using CD34 MicroBead Kit  
428 (Miltenyi Biotec) performed according to the manufacturer's protocol for positive  
429 selection of CD34+ cells from the mononuclear population. Isolated CD34+ cells were  
430 cultured in expansion medium (Stemspan SFEM (Stem Cell Technologies 09650),  
431 50ng/mL rhFLT3L (R&D 308-FKN), 50ng/mL rhSCF (R&D 255-SC), 10ng/mL rhIL-3  
432 (R&D 203-IL), 10ng/mL rhIL-6 (R&D 206-IL), 35nM UM171 and 500nM Stemreginin)  
433 with or without SA for 4 and 7 days.

434

#### 435 **Human skin acquisition, single cell suspension, isolation of melanocytes via 436 FACS and melanocyte culture**

437 Epidermal melanocytes were isolated from normal adult human breast skin. The skin  
438 samples were provided from Caucasoid donors (age 18 – 72) via The Victorian Cancer  
439 Biobank. Fat was removed from the skin and washed in PBS with Gentamycin (10  
440 µg/mL) and 80% EtOH. Then the skin was cut into small pieces (~5 mm<sup>2</sup>) and



441 incubated in Dispase (15 U/mL, Gibco/Thermo Fisher Scientific) with Gentamycin (10  
442 µg/mL) at 4°C overnight. Epidermis was peeled from dermis by forceps and smashed  
443 by scissors and incubated in Trypsin/EDTA (0.25%) at 37°C for 10 min to make a  
444 single cell suspension of the epidermal cells. After pipetting and addition of fetal bovine  
445 serum (FBS) to stop activity of trypsin (final concentration of FBS is 10%), the  
446 epidermal single cell suspension was passed through cell-strainers (70 µm then 40  
447 µm). After centrifugation (220g for 5 min) the collected epidermal cells were  
448 suspended in the staining medium and viability was validated microscopically with  
449 trypan blue.

450

451 The collected epidermal cells from skin were incubated with primary antibodies  
452 including FITC anti-human CD326 (EpCAM) (1:100, mouse), FITC anti-human CD31  
453 (1:100), FITC anti-human CD45 (1:100), FITC anti-human CD235a (1:100) and PE  
454 anti-human CD117 (c-kit) (1:100) in the staining media for 30 min at 4°C. After a wash  
455 and centrifuge the cells were suspended in DAPI (2.5 µg/mL) and subjected to FACS  
456 analysis (BD FACSAria™ Fusion flow cytometer, BD). Debris (by morphology plot:  
457 FSC-A/SSC-A), doublets (by doublet plot: FSC-H/FSC-W and SSC-H/SSC-W) and  
458 dead cells (DAPI+) were excluded. The Ckit+CD326-CD31-CD45-CD235a- fraction  
459 was sorted into 1.5 mL microcentrifuge tubes filled with Medium 254 (1 mL).

460

461 The sorted primary human melanocytes were plated on HaCaT-derived ECM-coated  
462 culture dish and cultured in Medium 254 supplemented with Human Melanocyte  
463 Growth Supplement-2 (HMGS-2, including basic FGF, insulin, transferrin, bovine  
464 pituitary extract, endothelin-1, FBS, heparin and hydrocortisone, concentrations are  
465 proprietary, PMA-free) at 37°C with 10% O<sub>2</sub> and 5% CO<sub>2</sub>.

466

### 467 **RNA-Seq data analysis**

468 FASTQ files were processed using Laxy (<https://zenodo.org/record/3767372>) which  
469 encompasses the RNAsik pipeline  
470 (<https://joss.theoj.org/papers/10.21105/joss.00583>). Briefly, GRCh38 reference  
471 genome was used for STAR alignment<sup>45</sup> and gene expression counts were performed  
472 using featureCounts<sup>46</sup>. Gene counts were analysed using Degust  
473 (<https://zenodo.org/record/3501067>) for differential expression analysis. Data



474 processing was performed on NeCTAR Cloud Servers, or MASSIVE High  
475 Performance Computing (HPC) cluster.

476

477 Differential gene expression analysis was performed using edgeR (v.3.32.1). Quasi-  
478 likelihood F-test was performed with glmQLFit and glmQLFTest functions. Gene  
479 ontology (GO) enrichment test was performed using PANTHER (v16.0) fisher's exact  
480 test corrected by false discovery rate (FDR).

481

### 482 **TCGA survival analysis**

483 The clinical data and mRNA expression profiles for skin cutaneous melanoma samples  
484 in TCGA PanCancer Atlas database were retrieved from MSKCC Cancer Genomics  
485 Data Server (CGDS) (<http://www.cbioportal.org>)<sup>47</sup>. The “high expression” and “low  
486 expression” groups for each gene were defined as above or below the median  
487 expression level for the cohort respectively. The overall survival (OS) curves were  
488 calculated with the Kaplan-Meier method and the statistical significance were tested  
489 with the log-rank test. The calculations were performed using the R package ‘survival’  
490 3.1-11 and the survival curves were plotted using the R package ‘survminer’ 0.4.4.

491

### 492 **Sample preparation for GTP analysis**

493  $1 \times 10^7$  A375 cells were washed once with 0.9% NaCl and cell pellets were snap frozen  
494 prior to LC-MS analysis. 200  $\mu$ L of extraction solvent (2:6:1 CHCl<sub>3</sub>: MeOH: H<sub>2</sub>O) at  
495 4°C was added to the washed cell pellets after which the samples were briefly  
496 vortexed, sonicated in an ice-water bath (10 minutes). Samples were then frozen in  
497 liquid nitrogen and thawed three times before mixing on a vibrating mixer at 4°C for 10  
498 minutes after which they were subjected to centrifugation (20,000 x g, 4°C, 10 min)  
499 and the supernatant transferred to samples vials for prompt (same day) LC-MS  
500 analysis.

501

### 502 **LC-MS analysis for metabolomics**

503 Samples were analyzed by hydrophilic interaction liquid chromatography coupled to  
504 triple quadrupole mass spectrometry (LC-MS). In brief, the chromatography utilized a  
505 ZIC-p(HILIC) column (Merck SeQuant ZIC-pHILIC 5 $\mu$ m 150 x 4.6 mm, polymeric) and  
506 guard (Merck SeQuant ZIC-pHILIC Guard, 20 x 2.1 mm, PEEK coated guard) with a  
507 gradient elution of 20 mM ammonium carbonate (A) and acetonitrile (B) (linear

508 gradient time-%B as follows: 0 min-80%, 15 min-50%, 18 min-5%, 21 min-5%, 24 min-  
509 80%, 32 min-80%) on a 1290 Infinity II (Agilent). The flow rate was maintained at 300  
510  $\mu\text{L}/\text{min}$  and the column temperature  $25^\circ\text{C}$ . Samples were kept at  $10^\circ\text{C}$  in the  
511 autosampler and  $5\ \mu\text{L}$  injected for analysis. The mass spectrometry was performed in  
512 multiple reaction monitoring (MRM) mode on an Agilent 6495 Triple Quadrupole. Full  
513 details are provided in supplementary material. Peak integration was carried out using  
514 MassHunter Qualitative Navigator B.08.00 (Agilent).

515

### 516 **LC-MS analysis for proteomics**

517 Immunoprecipitated proteins were reduced with 10 mM TCEP (Thermo Fisher),  
518 alkylated with 40 mM iodoacetamide (Sigma Aldrich) and digested with sequencing  
519 grade trypsin (Promega). Samples were acidified with 1% formic acid (FA) and purified  
520 using OMIX C18 Mini-Bed tips (Agilent) prior to LC-MS/MS analysis.

521

522 Using a Dionex UltiMate 3000 RSLCnano system equipped with a Dionex UltiMate  
523 3000 RS autosampler, an Acclaim PepMap RSLC analytical column ( $75\ \mu\text{m} \times 50\ \text{cm}$ ,  
524 nanoViper, C18,  $2\ \mu\text{m}$ ,  $100\text{\AA}$ ; Thermo Scientific) and an Acclaim PepMap 100 trap  
525 column ( $100\ \mu\text{m} \times 2\ \text{cm}$ , nanoViper, C18,  $5\ \mu\text{m}$ ,  $100\text{\AA}$ ; Thermo Scientific), the tryptic  
526 peptides were separated by increasing concentrations of 80% acetonitrile (ACN) /  
527 0.1% formic acid at a flow of  $250\ \text{nl}/\text{min}$  for 128 min and analyzed with a QExactive  
528 HF mass spectrometer (ThermoFisher Scientific). The instrument was operated in the  
529 data dependent acquisition mode to automatically switch between full scan MS and  
530 MS/MS acquisition. Each survey full scan ( $m/z\ 375\text{--}1575$ ) was acquired in the Orbitrap  
531 with 60,000 resolution (at  $m/z\ 200$ ) after accumulation of ions to a  $3 \times 10^6$  target value  
532 with maximum injection time of 54 ms. Dynamic exclusion was set to 15 seconds. The  
533 12 most intense multiply charged ions ( $z \geq 2$ ) were sequentially isolated and  
534 fragmented in the collision cell by higher-energy collisional dissociation (HCD) with a  
535 fixed injection time of 54 ms, 30,000 resolution and automatic gain control (AGC)  
536 target of  $2 \times 10^5$ .

537

538 Raw data files were analyzed with the MaxQuant software suite v1.6.5.0<sup>48</sup> and its  
539 implemented Andromeda search engine<sup>49</sup> to obtain protein identifications and their  
540 respective label-free quantification (LFQ) values using standard parameters. The  
541 proteomics data were further analyzed using either Perseus<sup>50</sup> or LFQ-Analyst<sup>51</sup>.

542

## 543 **Statistical Analysis**

544 Analysis was performed using GraphPad Prism version 8. All analyses were  
545 performed using log-rank test, unpaired two-tailed t-tests, one-way or two-way ANOVA  
546 plus Tukey's multiple comparison tests as appropriate to the data type. The statistical  
547 parameters are reported in figure legends or text of the results. P values less than 0.05  
548 were considered significant.

549

## 550 **RESULTS**

551

### 552 **Methyltransferase-independent activity of EZH2 in melanoma**

553

554 We recently reported that decreasing EZH2 abundance rather than EZH2  
555 methyltransferase activity may be a key to realizing the therapeutic potential of EZH2  
556 targeting in melanoma<sup>35</sup>. Further to investigate methyltransferase-independent  
557 functions of EZH2 in melanoma, we compared melanoma cells subjected to EZH2  
558 targeting by siEZH2 knockdown, or treatment with the EZH2 degrader DZNep or with  
559 EZH2-methyltransferase inhibitors GSK126 and EPZ-6438.

560

561 Although GSK126 and EPZ-6438 inhibited EZH2 methyltransferase activity as  
562 measured by H3K27me3 levels (Fig. 1A, S1A and S1B), they had no effect on the  
563 growth, clonogenicity, migration, invasion, or pigmentation of BRAFV600E mutant  
564 A375 and IGR37 melanoma cells, and only partial effects on NRASQ61K mutant  
565 C006-M1 cells (Fig. 1A-1F and S1A-S1H). In contrast, EZH2 knockdown or DZNep  
566 treatment displayed marked anti-melanoma effects and promoted melanocytic  
567 differentiation in all lines tested (Figure 1A-D and S1A-1H). These findings provide  
568 further evidence of methyltransferase independent functions of EZH2 in melanoma.

569

570 To examine methyltransferase-dependent and -independent transcriptional  
571 programs of EZH2, we performed global gene expression analysis in B16-F10 murine  
572 melanoma cells treated with siEzh2 knockdown vs siRNA control, and also with  
573 GSK126 vs DMSO control. 1370 genes were significantly increased by siEzh2  
574 depletion (Figure 1E, 1F), of which 1226 (89.5%) were not upregulated by GSK126  
575 treatment (Figure 1F). By gene ontology (GO) analysis, these 1226 genes were

576 enriched in melanin and cholesterol biosynthesis pathways (Figure 1G). Of the 1119  
577 genes that were downregulated by siEzh2 (Figure 1E-1H), 1087 (97.1 %) were not  
578 changed upon GSK126 treatment (Figure 1H) and strongly enriched in DNA replication  
579 and DNA repair pathways (Figure 1I). These data are consistent with regulation by  
580 EZH2 of methyltransferase-dependent as well as -independent transcriptional  
581 programs in melanoma.

582

583 Because siRNA might have off-target effects, we also tested a catalytically dead  
584 mutant of EZH2, H689A, which lacks methyltransferase activity. A375 cells were  
585 treated with control (sh-control) or 3' UTR EZH2 region-targeting shRNA (Figure 2A  
586 and S2A) to deplete endogenous EZH2, which was then rescued with either wild-type  
587 (V5-EZH2-WT) or H689A-mutant EZH2 (V5-EZH2-H689A). *In vitro* and *in vivo*,  
588 shEZH2 3'UTR knockdown reduced A375 and IGR37 clonogenicity, invasion, wound  
589 healing and tumour formation, and increased pigmentation, in a manner that was  
590 reversed similarly by ectopic expression of V5-EZH2-WT and V5-EZH2-H689A  
591 (Figure 2B-F and S2B-D).

592

593 To complement these data, we generated deletion mutants to interrogate EZH2  
594 domains that might rescue shEZH2 knockdown phenotypes (Figure 2G). Partial  
595 rescue of A375 cell clonogenicity and full rescue of cell invasion were observed in all  
596 shEZH2 3'UTR knockdown cells co-transfected with EZH2 deletion constructs that  
597 lacked the SET domain, which encodes methyltransferase. In contrast, rescue was  
598 not consistently observed with N-terminal EED domain deletion mutants ( $\Delta$ 1-169)  
599 [clone 6] with intact SET domains (Figure S2E, Figure 2G-I), confirming that the N-  
600 terminal EED domain of EZH2, rather than the methyltransferase-containing SET  
601 domain, is critical for the clonogenicity and invasion in melanoma.

602

### 603 **Interactions between the EZH2 and IMPDH2**

604

605 To characterize methyltransferase-independent actions of EZH2, we examined  
606 its interacting partners in melanoma by immunoprecipitating EZH2 from protein lysates  
607 and subjecting the precipitate to liquid chromatography mass spectrometry (LC-MS).  
608 Expected PRC2 complex proteins were identified as EZH2 binding partners in four  
609 *BRAF*<sup>V600E</sup> mutated cell lines, one *NRAS*<sup>Q61K</sup> mutated line, and in one *BRAF*<sup>V600E</sup> PDX

610 melanoma (Figure 3A and Table S2). Additionally, ubiquitin degradation pathway  
611 proteins UBR4 and NPLOC4, Kinesin 1 complex proteins including KIF5B, KLC1,  
612 KLC2 and KLC4, and Inosine-5'-monophosphate dehydrogenase 2 (IMPDH2), were  
613 all consistently co-immunoprecipitated with EZH2.

614

615 We focused on IMPDH2-EZH2 interactions because of IMPDH2's known role  
616 in GTP metabolism<sup>52</sup>. Further, we found that IMPDH2 protein level is upregulated in  
617 human melanoma cells compared to normal human melanocytes (Figure S3A) and  
618 that high IMPDH2 expression is correlated with poor melanoma survival ( $p= 0.01$ ,  
619 cbioportal) (Figure S3B). To investigate EZH2-IMPDH2 interactions, we verified them  
620 endogenously in lysates from A375 cells and PDX tumors by reciprocal Co-IP (Figure  
621 3B and S3C), finding. Interactions were reproducibly seen even after GSK126 or  
622 EPZ6438 treatment, suggesting they occur independently of EZH2 methyltransferase  
623 activity (Figure 3SD). Furthermore, we were unable to detect IMPDH2 methylation in  
624 EZH2 Co-IPs by mass spectrometry (Table S3).

625

626 To define interacting domains, we exogenously co-expressed tagged EZH2  
627 (HA-EZH2) with both full length IMPDH2 (MYC/FLAG-IMPDH2) in HEK293 cells  
628 (Figure S3E) and with the CBS domain of IMPDH2 [V5-IMPDH2-(1-187)] in A375 cells  
629 (Figure 3C). GST pull down assays showed that the CBS domain of IMPDH2 interacts  
630 with the N-terminal EED binding domain (1-170) of EZH2 (Figure 3D, 3E). EZH2 EED  
631 domain interactions with full length IMPDH2 were verified using exogenously  
632 expressed V5-EZH2 deletion mutants and MYC/FLAG-IMPDH2 (Figure 3F).

633

634 Further to characterize EZH2-IMPDH2 interactions, we also performed  
635 proximity ligation assays (PLAs). 60% of A375 cells showed cytosolic EZH2-IMPDH2  
636 interactions (<40nm apart, average 15 foci per cell), and 40% showed both cytosolic  
637 and nuclear interactions (average 4 foci per cell were nuclear, Figure 3G). These  
638 results were supported by western blotting of separated cytosolic and nuclear protein  
639 fractions (Figure 3H) and multiplex immunofluorescence labelling of melanoma cell  
640 lines (Figure S3F). In contrast, we did not detect cytosolic IMPDH2 interactions with  
641 the PRC2 component SUZ12 by PLA, although 10% of cells showed PLA positive  
642 nuclear foci (average 4 per cell, Figure 3G).

643

644           These data indicate that although EZH2 is mostly localized in nuclei, its N-  
645 terminal EED domain interacts directly with the IMPDH2-CBS domain predominantly  
646 in the cytosol and independently of PRC2 complex formation or EZH2  
647 methyltransferase activity in melanoma cells.

648

### 649 **Cytosolic EZH2 drives melanoma progression**

650

651           To test a potential role for cytoplasmic EZH2 in melanoma progression, we  
652 developed an EZH2 mutant lacking a nuclear localization domain (EZH2- $\Delta$ NLS). We  
653 first generated A375 cells with stable 3'UTR EZH2 knockdown (to minimize  
654 endogenous EZH2) and then rescued EZH2 with full length (V5-EZH2-WT) or V5-  
655 EZH2-WT- $\Delta$ NLS lentiviral constructs. V5-EZH2-WT- $\Delta$ NLS expression was mostly  
656 cytoplasmic and depleted nuclear EZH2 methyltransferase activity on histone H3K27  
657 (Figure S3G).

658

659           A375 shEZH2 melanoma cells and xenograft tumors displayed reduced  
660 invasion and tumorigenicity that were restored similarly by WT-EZH2 and V5-EZH2-  
661 WT- $\Delta$ NLS (Figure 3I, 3J and S3H). Moreover, overexpression of cytosolic EZH2  
662 lacking methyltransferase activity (V5-EZH2-H689A- $\Delta$ NLS) also restored the invasive  
663 phenotype of shEZH2 A375 cells to levels comparable to those achieved with V5-  
664 EZH2-WT- $\Delta$ NLS. Although p38-dependent phosphorylation of EZH2 at its T367  
665 residue was shown to induce cytosolic localization of EZH2 in breast cancer<sup>38</sup>, analysis  
666 of post-translational modifications of EZH2 in our EZH2-IP LC-MS data did not show  
667 significantly different phosphorylation isoforms between cytosolic and nuclear EZH2  
668 (Figure S3I, Table S4). Thus, cytoplasmic EZH2 expression is sufficient to promote  
669 melanoma cell invasion and tumorigenicity irrespective of EZH2 nuclear or  
670 methyltransferase function.

671

### 672 **Increased cytosolic localization and activation of IMPDH2 by EZH2**

673

674           We next investigated effects of EZH2-IMPDH2 interactions on IMPDH2  
675 localization and tetramerization/activity. Stable EZH2 knockdown slightly decreased  
676 total IMPDH2 protein, but not mRNA expression, that was later rescued by  
677 overexpression of EZH2 (1-340) [clone 2] (Figure S3J). Fractionation and



678 immunofluorescence experiments showed that stable or transient EZH2 knockdown  
679 increased the nuclear localization of endogenous IMPDH2 and exogenously  
680 expressed IMPDH2-CBS domain (Figure 3K, S3K, S3L). Conversely, overexpression  
681 of cytosolic wild-type EZH2 (V5-EZH2-WT- $\Delta$ NLS) or of cytosolic EZH2 (1-340) [clone  
682 2] increased cytosolic IMPDH2 compared to overexpression of wild type EZH2 (V5-  
683 EZH2-WT) in endogenous EZH2- silenced A375 cells (Figure 3L, S3M), independently  
684 of EZH2 methyltransferase activity (Figure 3L and S3G).

685

686 As tetramerization is an essential step in IMPDH2 activation<sup>13,16,53</sup>, we  
687 investigated effects of EZH2 on IMPDH2 tetramerization and activation in A375 cells.  
688 Cross-linked whole-cell extracts showed that IMPDH2 rather than IMPDH1 tetramers  
689 were decreased by stable/transient EZH2 knockdown that was rescued by  
690 overexpression with wild-type or methyltransferase-deficient EZH2 (full length and  
691 EZH2 (1-340) [clone 2], Figures 3M, S3N and S3O). Additionally, co-incubation of  
692 IMPDH2 with EZH2 increased basal IMPDH2 activity and reversed GTP-mediated  
693 allosteric inhibition of IMPDH2 (Figure 3N).

694

### 695 **GTP-dependent regulation by IMPDH2 of ribosome biogenesis and actomyosin** 696 **contractility**

697

698 We next assessed pharmacological and genetic inhibition of IMPDH2 in  
699 melanoma. Treatment with mycophenolic acid (MPA) or ribavirin, pan-IMPDH  
700 inhibitors<sup>12,54,55</sup>, decreased cell proliferation, clonogenicity and invasion that was  
701 rescued by guanosine addition regardless of B-Raf or N-Ras mutational status (Figure  
702 4A-E and 4A-S4E). MPA and ribavirin also induced pigmentation and senescence  
703 (Figure S4F, S4G). siRNA silencing of IMPDH2 also retarded melanoma cell  
704 proliferation and invasion that was restored by guanosine addition (Figure 4F, 4G, S4H  
705 and S4I). These results implicate a GTP-dependent role for IMPDH2 in melanoma  
706 progression.

707

708 IMPDH2-dependent GTP biosynthesis was shown to support rRNA and tRNA  
709 synthesis<sup>7</sup>. Many tumor cells exhibit increased Pol I activity<sup>7,56-58</sup>, and GTP-dependent  
710 Pol I activation has been shown in several cancers<sup>59,60</sup>. We thus examined RNA  
711 synthesis by qRT-PCR in A375 cells and found that both MPA treatment and IMPDH2



712 silencing blunted pre-rRNA (Pol I transcript), and pre-tRNA<sup>I13</sup> (Pol III transcript)  
713 expression levels, but not pre-GAPDH mRNA (Pol II transcript), in a time dependent  
714 manner (Figure 4G and S4I). This correlated with triggering nucleolar stress responses  
715 characterized by delocalization of nucleolin and induction of p53 activity (Figure 4H,  
716 4I, S4J, S4K and S4L), with both effects reversed by guanosine (Figure 4H, 4I). We  
717 thus conclude that IMPDH2 regulates ribosome biogenesis in melanoma cells via *de*  
718 *novo* GTP synthesis.

719

720 GTP is also essential for G-protein activity<sup>11</sup>, and Rho-GTPases regulate the  
721 actomyosin cytoskeleton via ROCK I/II activation and phosphorylation of MLC2 in  
722 myosin II to promote melanoma progression<sup>3,4,61</sup>. MPA treatment and IMPDH2  
723 silencing in melanoma cells reduced RhoA activity and phospho-MLC2/F-actin levels  
724 (Figure 4J and S4M), and guanosine again rescued these effects (Figure 4J and S4M),  
725 indicating that IMPDH2 regulates actomyosin contractility via GTP synthesis.

726

## 727 **EZH2 promotes clonogenic and invasive phenotypes via IMPDH2 and cellular** 728 **GTP**

729

730 IMPDH2 is the rate-limiting enzyme in the production of GTP<sup>62-64</sup>. Because  
731 EZH2 regulated IMPDH2 tetramerization and activity (Figures 3M and 3N), we  
732 checked the contribution of EZH2 to cellular GTP production in melanoma. Stable  
733 EZH2 knockdown reduced GTP levels by 50% in A375 cells, an effect that was  
734 reversed by overexpression with N-terminal domain of EZH2 (1-340) [clone 2] (Figure  
735 5A), which we previously identified as an interaction site for IMPDH2 (Figures 3D-F).  
736 Concurrently, EZH2 knockdown also reduced cell proliferation, migration and invasion  
737 in a guanosine-reversible manner (Figure 5B and S5A-D). Moreover, EZH2-WT or -  
738 H689A overexpression induced cell proliferation and invasion, which were reduced to  
739 shEZH2 levels by IMPDH2 silencing; again, these effects were rescued by guanosine.  
740 These data implicate IMPDH2 as a key intermediary between EZH2 and GTP  
741 synthesis in melanoma (Figure 5C, 5D and S5C-D), in which case EZH2 would be  
742 expected to modulate critical, IMPDH2- and GTP-dependent functions in cancer cells,  
743 such as rRNA metabolism and GTPase activity (Figures 4G-J).

744

745 Consistent with this, EZH2 knockdown reduced rRNA synthesis and ribosome  
746 biogenesis and induces p53 in melanoma cells (Figures 5E, S5E and S5F) in a  
747 guanosine-reversible manner (Figure S5E). Additionally, RhoA activity and phospho-  
748 MLC2 levels were lowered by EZH2 silencing (Figure 5F, 5G, S5G, S5H and S5I) and  
749 similarly restored by guanosine (Figure 5H and S5G). Reduced phospho-MLC2 was  
750 also seen using siEZH2 constructs or EZH2 degradation by DZNep or MS1943, but  
751 not by use of EZH2 methyltransferase inhibitors GSK126 and EPZ-6438 (Figure S5J,  
752 S5K), consistent with a methyltransferase-independent role for EZH2 in RhoA  
753 dependent myosin II activation. In summary, EZH2 regulates levels and critical  
754 functions of cellular GTP in melanoma via IMPDH2.

755

### 756 **Nucleolar size and the cytosolic localization of EZH2-IMPDH2 interactions are** 757 **increased during melanoma progression in patients**

758

759 If cytosolic EZH2-IMPDH2 interactions drive melanoma cell proliferation and  
760 invasion as above, then increased cytosolic expression of these proteins might be  
761 expected during melanoma progression in patients. To test this, we interrogated the  
762 Protein Atlas database ([https://www.proteinatlas.org/ENSG00000178035-](https://www.proteinatlas.org/ENSG00000178035-IMPDH2/tissue/skin#img)  
763 [IMPDH2/tissue/skin#img](https://www.proteinatlas.org/ENSG00000178035-IMPDH2/tissue/skin#img)), observing IMPDH2 expression but undetectable EZH2  
764 labelling in the nuclei of normal human melanocytes. Consistent with this, in  
765 immunostaining of normal human melanocytes and melanoma samples, EZH2 and  
766 IMPDH2 expression were either not detectable or nuclear in normal melanocytes and  
767 stage I melanoma samples (Figures 5I and S5M). In stage IV metastatic melanomas,  
768 however, cytosolic EZH2 and IMPDH2 expression were significantly increased and  
769 associated with increased cellular nucleolar size, an indicator of ribosome biogenesis  
770 (Figure 5I). A functional, methyltransferase-independent link between nucleolar size  
771 and EZH2 was verified in tumours from A375 cells in which EZH2 was depleted by  
772 shEZH2-3'UTR and then re-expressed with either wild-type or methyltransferase-  
773 deficient EZH2 (Figure S5L). These data are consistent with the possibility that  
774 cytosolic EZH2-IMPDH2 interactions drive ribosome biogenesis during melanoma  
775 progression in patients.

776

### 777 **Sappanone A impedes EZH2-IMPDH2 interactions and melanoma progression**

778

779 As EZH2 interacts with CBS domain of IMPDH2 (Figure 3C), we sought to test  
780 drugs that can inhibit this interaction. A small molecule called Sappanone A (SA) was  
781 demonstrated specifically to inhibit IMPDH2 by directly targeting the conserved  
782 cysteine residue 140 (Cys140) in the CBS domain of IMPDH2, inducing an allosteric  
783 effect on the catalytic pocket that suppressed IMPDH2 activity. We thus examined  
784 effects of SA on EZH2-IMPDH2 interactions and melanoma progression. SA inhibited  
785 both endogenous EZH2-IMPDH2 interactions, EZH2-IMPDH2-CBS domain  
786 interactions and IMPDH2 tetramerization in A375 and B16-F10 cells in a dose-  
787 dependent manner (Figure 6A-C and S6A-B). In addition, 10 to 20  $\mu$ M of SA also  
788 promoted nuclear localization of IMPDH2 (Figure 6D and S6C). These data indicated  
789 that EZH2-IMPDH2 interactions can be targeted by SA.

790

791 *In vitro*, SA reduced melanoma cell proliferation and clonogenicity dose-  
792 dependently and in a manner that was reversed by guanosine (Figure 6E and S6D,  
793 S6E). Moreover, induction of cell proliferation and invasion by EZH2-WT  
794 overexpression following shEZH2 transduction were reduced to those of shEZH2 by  
795 5  $\mu$ M SA treatment, an effect that was able to be rescued by guanosine (Figure 6F  
796 and S6F). In 3D Matrigel spheroid assays, pre-treatment with SA for 10 days prior to  
797 seeding spheroid cultures or treatment of established spheroids demonstrated  
798 profound anti-melanoma effects, even after 7 days of SA drug washout (Figures 6G-J  
799 and S6G-I). SA also induced ribosomal stress and reduced myosin II activation in  
800 A375 cells (Figure 6M and S6L).

801

802 To examine normal cells that might be susceptible to targeting the EZH2-  
803 IMPDH2 interactome, we performed LC/MS on EZH2-immunoprecipitated lysates  
804 from CD34<sup>+</sup> human bone marrow progenitor cells. Although IMPDH2 was detected in  
805 anti-EZH2 immunoprecipitates, this could not be verified by CoIP-coupled WB in the  
806 same stringency conditions used previously (Table S2 and Figure 6N). Consistent with  
807 this, SA has no observable cytotoxic effect on blood progenitors (Figure 6O). Similarly,  
808 SA treatment of freshly isolated normal human melanocytes for 7 days at 2 to 5  $\mu$ M  
809 did not significantly attenuate cell growth (Figure 6P). These data indicate that  
810 pharmacological inhibition of EZH2-IMPDH2 interactions by SA attenuates melanoma  
811 progression without melanocyte and blood cell toxicity by impeding rRNA metabolism  
812 and actomyosin contractility.

813

814 **EZH2-IMPDH2 interactions and Sappanone A treatment in uveal melanoma and**  
815 **non-melanoma cancers**

816

817 Although increased EZH2 and IMPDH2 have been linked to many solid  
818 cancers<sup>10</sup>, potential interactions between them have not been reported. We thus  
819 extended the above studies, examining EZH2 and IMPDH2 levels and interactions in  
820 uveal melanoma (92.1 and OMM1), and ovarian (OVCAR-3 and OVCAR-8), breast  
821 (MCF7 and MDA-MB-231), and prostate (LNCaP and C4:2) cancer cell lines. Cytosolic  
822 EZH2/IMPDH2 interactions were seen in all lines tested (Figures 7A-E and S7A-E).  
823 Moreover, total EZH2 degradation by MS1943 treatment, but not treatment with  
824 GSK126, a EZH2 methyltransferase inhibitor, attenuated OMM1, OVCAR-8, MDA-  
825 MB-231, and C4-2 cell growth. We therefore also tested effects of SA on EZH2-  
826 IMPDH2 interactions and IMPDH2 activity in OMM1, OVCAR-8, MDA-MB-231, and  
827 PC3 cells, observing reduced EZH2-IMPDH2 interactions (Figure 7F-G, S7F-G) and  
828 IMPDH2 tetramerization in every case (Figure S7H-K). These data suggest that  
829 cytosolic EZH2-IMPDH2 interactions may be a therapeutic target in a range of cancers  
830 beyond cutaneous melanoma.

831

832 Broadly, our findings support a model of EZH2 function in which its canonical  
833 role in the repressive PRC2 complex is complemented in at least some cancers by  
834 methyltransferase independent cytosolic EZH2 sequestration and binding to IMPDH2  
835 to activate GTP synthesis and facilitate ribosome biogenesis and actomyosin  
836 contractility, thereby promoting cancer progression (Figure 7L).

837

838 **DISCUSSION**

839

840 EZH2 is a bona-fide oncoprotein in cutaneous and uveal melanomas<sup>24-28,65</sup>, and  
841 breast<sup>66</sup>, prostate<sup>67</sup>, and ovarian<sup>68</sup> cancers, imparting proliferative, migratory, and  
842 invasive cancer cell phenotypes. However, the mechanisms through which it imparts  
843 these properties are incompletely understood. Here, we reveal a previously  
844 unappreciated, methyltransferase-independent function of EZH2 that acts via cytosolic  
845 interactions with and activation of IMPDH2 to maintain cellular GTP.

846

847 Recently, uveal melanoma cells were shown to be resistant to EZH2  
848 methyltransferase inhibition<sup>69</sup> unless exposed to supraphysiological doses<sup>70</sup>. Further,  
849 triple-negative breast cancer MDA-MB-231 cells and castrate-resistant prostate cancer  
850 C4-2 and DU145 cells were also reported to be similarly resistant, although sensitive  
851 to total EZH2 silencing, suggesting methyltransferase-independent functions of  
852 EZH2<sup>38,67,71</sup>. Using an unbiased proteomics approach, we uncovered  
853 methyltransferase-independent binding partners of EZH2 in cutaneous melanoma to  
854 identify IMPDH2 as a critical mediator of the oncogenic effects of EZH2. Furthermore,  
855 we showed that EZH2-IMPDH2 interactions are commonly seen and functionally  
856 consequential in other cancers, suggesting that their targeting may represent a  
857 common molecular target in human cancer.

858

859 Previous studies found that EZH2 controls melanoma growth and metastasis  
860 through transcriptional repression of distinct tumor suppressors, such as ciliary genes  
861 and AMD1 in N-Ras mutant tumors<sup>27,28</sup> and also regulates mechanisms of adaptive  
862 resistance to immunotherapy<sup>30</sup>. Recently, the combination of EZH2 and MEK inhibition  
863 was found to reduce tumor burden markedly in *NRAS* mutant cells, but not *BRAF*  
864 mutant cells<sup>72</sup>. This is consistent with our observations of partial anti-melanoma effects  
865 following EZH2 methyltransferase inhibition in *NRAS* mutant melanoma cells. In  
866 contrast, *BRAF* mutant melanoma cells were resistant to EZH2 methyltransferase  
867 inhibition but sensitive to total EZH2 silencing. Methyltransferase-dependent functions  
868 of EZH2 may be more prominent in *NRAS* mutant melanomas due to lower expression  
869 levels of IMPDH2 and EZH2 in *NRAS* mutant cell lines compared with *BRAF* mutant  
870 cells.

871

872 Cytosolic localization of EZH2 contributes to pro-metastatic behaviors (i.e.  
873 invasion, migration), but this may involve methyltransferase dependent or independent  
874 mechanisms in different cell types<sup>34</sup>. Cytoplasmic localization of EZH2 was observed  
875 in murine fibroblasts, where it retained methyltransferase activity and regulated actin  
876 polymerization<sup>36</sup>. In leukocytes, EZH2 methylated the cytoplasmic protein talin-1 to  
877 enhance cell migration by inhibiting binding of talin-1 to F-actin<sup>73</sup>. p38-dependent  
878 phosphorylation of EZH2 at the T367 residue was shown to induce cytosolic  
879 localization of EZH2 in breast cancer cells, where it interacted with cytoskeletal  
880 proteins to promote metastasis<sup>38</sup>. Cytoplasmic EZH2 expression has also been

881 observed in prostate cancer cells<sup>37</sup>. In this study, we identified EZH2 as a regulator of  
882 RhoAGTPase activity and actomyosin contractility via RhoA/ROCK/myosin II  
883 activation<sup>3,4,61,74</sup>. Consistent with a role for EZH2 in metastasis, we observed cytosolic  
884 localization of EZH2 in melanoma cells particularly in association with more  
885 advanced/metastatic disease. However, this was not explained by differential  
886 phosphorylation of EZH2. The mechanism of nuclear-cytosolic EZH2 shuttling in  
887 melanoma cells remains to be elucidated, although our identification by LC-MS of  
888 interactions between EZH2 and kinesin family protein components suggests a role for  
889 the latter.

890

891 Our data suggest that by altering the subcellular localization of IMPDH2,  
892 cytosolic EZH2 may switch differentiation-inducing nuclear IMPDH2 into proliferation-  
893 inducing cytosolic IMPDH2. Nuclear IMPDH accumulates during the G2 phase of the  
894 cell cycle or following replicative/oxidative stress, and binds to single-stranded, CT-  
895 rich DNA sequences via its CBS domain<sup>75-79</sup>. Thus, in nuclei, IMPDH acts as a  
896 transcriptional regulator of histones and E2F genes independently of its enzymatic  
897 activity<sup>79</sup>. Interestingly, in mouse melanoma cells, *Impdh2* disruption by SA reduced  
898 pigmentation via repression of tyrosinase gene expression<sup>80</sup>.

899

900 In this study, we confirmed that EZH2 alters the subcellular localization of  
901 IMPDH, as EZH2 knockdown enhanced nuclear localization of IMPDH2. Functionally,  
902 gene expression analysis showed that pigmentation-related genes (*Tyr*, *Oca2*, *Trp1*)  
903 were upregulated by *Ezh2* knockdown independent of its methyltransferase function.  
904 These lines of evidence suggest that EZH2 may regulate pigmentation-related gene  
905 expression via regulation of IMPDH2 nuclear localization. We cannot exclude the  
906 possibility that EZH2 manipulation may induce oxidative stress that induces nuclear  
907 IMPDH2 localization in melanoma cells. However, in normal melanocytes where EZH2  
908 was not observed, we observed nuclear IMPDH2. Thus, in the absence of EZH2,  
909 nuclear IMPDH2 may stabilize melanocyte differentiation in normal melanocytes and  
910 melanomas, whereas during melanoma progression, augmented cytosolic EZH2 may  
911 move IMPDH2 to the cytosol where its GTP-producing enzymatic activity supports cell  
912 growth and invasion.

913



914 Pharmacological targeting of IMPDH2 may represent a tolerable therapeutic  
915 strategy in EZH2-IMPDH2 activated cancers. Although trials of pan-IMPDH inhibitors,  
916 such as MPA, tiazofurin and benzamide riboside, have been conducted in patients  
917 with leukemia and multiple myeloma<sup>81-84</sup>, these studies were terminated due to  
918 neurotoxic side effects<sup>52,85,86</sup>. Because IMPDH2 is mainly expressed in rapidly  
919 proliferating immunocytes, in contrast to the IMPDH1 isoform in normal human  
920 leukocytes and lymphocytes<sup>87,88</sup>, MPA was shown recently to have more  
921 hematological side effects than the IMPDH2 specific inhibitor, SA, *in vivo*<sup>16</sup>. Consistent  
922 with this, we demonstrated low or no EZH2-IMPDH2 interactions in CD34<sup>+</sup> human  
923 blood progenitors and SA demonstrated no anti-proliferative effects on these cells, in  
924 contrast to melanoma cells. Although we found that MPA is anti-tumorigenic and anti-  
925 metastatic in melanoma cells, IMPDH2 specific inhibitors are likely to be better and  
926 better tolerated treatment options.

927

928 In conclusion, we report a role for the EZH2 oncoprotein in promoting  
929 tumorigenesis and metastasis in melanoma cells by interacting with IMPDH2 to  
930 promote GTP generation, and thereby mechanisms such as upregulating rRNA  
931 metabolism and actomyosin contractility that support cancer progression. Discovery  
932 of this previously unappreciated, non-enzymatic, GTP-dependent function of EZH2  
933 opens new avenues for EZH2-targeted therapeutics.

934

## 935 REFERENCES

936

- 937 1. Dang, C.V. Links between metabolism and cancer. *Genes Dev* **26**, 877-890 (2012).
- 938 2. Wawrzyniak, J.A., *et al.* A purine nucleotide biosynthesis enzyme guanosine monophosphate  
939 reductase is a suppressor of melanoma invasion. *Cell Rep* **5**, 493-507 (2013).
- 940 3. Sanz-Moreno, V., *et al.* Rac activation and inactivation control plasticity of tumor cell  
941 movement. *Cell* **135**, 510-523 (2008).
- 942 4. Sanz-Moreno, V., *et al.* ROCK and JAK1 signaling cooperate to control actomyosin contractility  
943 in tumor cells and stroma. *Cancer cell* **20**, 229-245 (2011).
- 944 5. Ruggero, D. & Pandolfi, P.P. Does the ribosome translate cancer? *Nat Rev Cancer* **3**, 179-192  
945 (2003).
- 946 6. Ruggero, D. Revisiting the nucleolus: from marker to dynamic integrator of cancer signaling.  
947 *Science signaling* **5**, pe38 (2012).
- 948 7. Kofuji, S., *et al.* IMP dehydrogenase-2 drives aberrant nucleolar activity and promotes  
949 tumorigenesis in glioblastoma. *Nature cell biology* **21**, 1003-1014 (2019).
- 950 8. Donizy, P., Biecek, P., Halon, A., Maciejczyk, A. & Matkowski, R. Nucleoli cytormorphology in  
951 cutaneous melanoma cells - a new prognostic approach to an old concept. *Diagn Pathol* **12**,  
952 88 (2017).



- 953 9. Drygin, D., *et al.* Targeting RNA polymerase I with an oral small molecule CX-5461 inhibits  
954 ribosomal RNA synthesis and solid tumor growth. *Cancer research* **71**, 1418-1430 (2011).
- 955 10. Kofuji, S. & Sasaki, A.T. GTP metabolic reprogramming by IMPDH2: unlocking cancer cells'  
956 fuelling mechanism. *J Biochem* **168**, 319-328 (2020).
- 957 11. Wennerberg, K., Rossman, K.L. & Der, C.J. The Ras superfamily at a glance. *J Cell Sci* **118**, 843-  
958 846 (2005).
- 959 12. Hedstrom, L. IMP dehydrogenase: structure, mechanism, and inhibition. *Chem Rev* **109**, 2903-  
960 2928 (2009).
- 961 13. Zhang, R., *et al.* Characteristics and crystal structure of bacterial inosine-5'-monophosphate  
962 dehydrogenase. *Biochemistry* **38**, 4691-4700 (1999).
- 963 14. Johnson, M.C. & Kollman, J.M. Cryo-EM structures demonstrate human IMPDH2 filament  
964 assembly tunes allosteric regulation. *Elife* **9**(2020).
- 965 15. Sintchak, M.D., *et al.* Structure and mechanism of inosine monophosphate dehydrogenase in  
966 complex with the immunosuppressant mycophenolic acid. *Cell* **85**, 921-930 (1996).
- 967 16. Liao, L.X., *et al.* Highly selective inhibition of IMPDH2 provides the basis of  
968 antineuroinflammation therapy. *Proc Natl Acad Sci U S A* **114**, E5986-E5994 (2017).
- 969 17. Caputo, E., *et al.* Characterization of human melanoma cell lines and melanocytes by  
970 proteome analysis. *Cell Cycle* **10**, 2924-2936 (2011).
- 971 18. Mannava, S., *et al.* Direct role of nucleotide metabolism in C-MYC-dependent proliferation of  
972 melanoma cells. *Cell Cycle* **7**, 2392-2400 (2008).
- 973 19. Kiguchi, K., Collart, F.R., Henning-Chubb, C. & Huberman, E. Induction of cell differentiation in  
974 melanoma cells by inhibitors of IMP dehydrogenase: altered patterns of IMP dehydrogenase  
975 expression and activity. *Cell Growth Differ* **1**, 259-270 (1990).
- 976 20. Cao, R., *et al.* Role of histone H3 lysine 27 methylation in Polycomb-group silencing. *Science*  
977 **298**, 1039-1043 (2002).
- 978 21. Cao, R. & Zhang, Y. SUZ12 is required for both the histone methyltransferase activity and the  
979 silencing function of the EED-EZH2 complex. *Molecular cell* **15**, 57-67 (2004).
- 980 22. Simon, J.A. & Kingston, R.E. Mechanisms of polycomb gene silencing: knowns and unknowns.  
981 *Nature reviews. Molecular cell biology* **10**, 697-708 (2009).
- 982 23. Eich, M.L., Athar, M., Ferguson, J.E., 3rd & Varambally, S. EZH2-Targeted Therapies in Cancer:  
983 Hype or a Reality. *Cancer Res* **80**, 5449-5458 (2020).
- 984 24. Bachmann, I.M., *et al.* EZH2 expression is associated with high proliferation rate and  
985 aggressive tumor subgroups in cutaneous melanoma and cancers of the endometrium,  
986 prostate, and breast. *Journal of clinical oncology : official journal of the American Society of*  
987 *Clinical Oncology* **24**, 268-273 (2006).
- 988 25. Bracken, A.P., *et al.* EZH2 is downstream of the pRB-E2F pathway, essential for proliferation  
989 and amplified in cancer. *The EMBO journal* **22**, 5323-5335 (2003).
- 990 26. Fan, T., *et al.* EZH2-dependent suppression of a cellular senescence phenotype in melanoma  
991 cells by inhibition of p21/CDKN1A expression. *Molecular cancer research : MCR* **9**, 418-429  
992 (2011).
- 993 27. Zingg, D., *et al.* EZH2-Mediated Primary Cilium Deconstruction Drives Metastatic Melanoma  
994 Formation. *Cancer cell* **34**, 69-84 e14 (2018).
- 995 28. Zingg, D., *et al.* The epigenetic modifier EZH2 controls melanoma growth and metastasis  
996 through silencing of distinct tumour suppressors. *Nature communications* **6**, 6051 (2015).
- 997 29. Tiffen, J., Wilson, S., Gallagher, S.J., Hersey, P. & Filipp, F.V. Somatic Copy Number  
998 Amplification and Hyperactivating Somatic Mutations of EZH2 Correlate With DNA  
999 Methylation and Drive Epigenetic Silencing of Genes Involved in Tumor Suppression and  
1000 Immune Responses in Melanoma. *Neoplasia* **18**, 121-132 (2016).
- 1001 30. Zingg, D., *et al.* The Histone Methyltransferase Ezh2 Controls Mechanisms of Adaptive  
1002 Resistance to Tumor Immunotherapy. *Cell Rep* **20**, 854-867 (2017).
- 1003 31. Kim, K.H. & Roberts, C.W. Targeting EZH2 in cancer. *Nature medicine* **22**, 128-134 (2016).

- 1004 32. Rugo, H.S., *et al.* The Promise for Histone Methyltransferase Inhibitors for Epigenetic Therapy  
1005 in Clinical Oncology: A Narrative Review. *Advances in therapy* **37**, 3059-3082 (2020).
- 1006 33. Duan, R., Du, W. & Guo, W. EZH2: a novel target for cancer treatment. *Journal of hematology*  
1007 *& oncology* **13**, 104 (2020).
- 1008 34. Huang, J., *et al.* The noncanonical role of EZH2 in cancer. *Cancer science* **112**, 1376-1382  
1009 (2021).
- 1010 35. Abali, G.K., *et al.* EZH2 Abundance Regulated by UHRF1/UBE2L6/UBR4 Ubiquitin System is the  
1011 Potential Therapeutic Target to Trigger Pigmented Phenotype in Melanoma. *bioRxiv*,  
1012 2021.2003.2004.433988 (2021).
- 1013 36. Su, I.H., *et al.* Polycomb group protein ezh2 controls actin polymerization and cell signaling.  
1014 *Cell* **121**, 425-436 (2005).
- 1015 37. Bryant, R.J., Winder, S.J., Cross, S.S., Hamdy, F.C. & Cunliffe, V.T. The Polycomb Group protein  
1016 EZH2 regulates actin polymerization in human prostate cancer cells. *The Prostate* **68**, 255-263  
1017 (2008).
- 1018 38. Anwar, T., *et al.* p38-mediated phosphorylation at T367 induces EZH2 cytoplasmic localization  
1019 to promote breast cancer metastasis. *Nature communications* **9**, 2801 (2018).
- 1020 39. Pang, J., *et al.* Invasive breast carcinomas in Ghana: high frequency of high grade, basal-like  
1021 histology and high EZH2 expression. *Breast Cancer Res Treat* **135**, 59-66 (2012).
- 1022 40. Ahmad, F., *et al.* Telomerase reverse transcriptase (TERT) - enhancer of zeste homolog 2  
1023 (EZH2) network regulates lipid metabolism and DNA damage responses in glioblastoma.  
1024 *Journal of neurochemistry* **143**, 671-683 (2017).
- 1025 41. Yiew, N.K.H., *et al.* Enhancer of zeste homolog 2 (EZH2) regulates adipocyte lipid metabolism  
1026 independent of adipogenic differentiation: Role of apolipoprotein E. *The Journal of biological*  
1027 *chemistry* **294**, 8577-8591 (2019).
- 1028 42. Behren, A., *et al.* The Ludwig institute for cancer research Melbourne melanoma cell line  
1029 panel. *Pigment Cell Melanoma Res* **26**, 597-600 (2013).
- 1030 43. Kuser-Abali, G., Alptekin, A., Lewis, M., Garraway, I.P. & Cinar, B. YAP1 and AR interactions  
1031 contribute to the switch from androgen-dependent to castration-resistant growth in prostate  
1032 cancer. *Nature communications* **6**, 8126 (2015).
- 1033 44. Livak, K.J. & Schmittgen, T.D. Analysis of relative gene expression data using real-time  
1034 quantitative PCR and the 2(-Delta Delta C(T)) Method. *Methods* **25**, 402-408 (2001).
- 1035 45. Dobin, A., *et al.* STAR: ultrafast universal RNA-seq aligner. *Bioinformatics* **29**, 15-21 (2013).
- 1036 46. Liao, Y., Smyth, G.K. & Shi, W. featureCounts: an efficient general purpose program for  
1037 assigning sequence reads to genomic features. *Bioinformatics* **30**, 923-930 (2014).
- 1038 47. Cerami, E., *et al.* The cBio cancer genomics portal: an open platform for exploring  
1039 multidimensional cancer genomics data. *Cancer Discov* **2**, 401-404 (2012).
- 1040 48. Tyanova, S., Temu, T. & Cox, J. The MaxQuant computational platform for mass spectrometry-  
1041 based shotgun proteomics. *Nat Protoc* **11**, 2301-2319 (2016).
- 1042 49. Cox, J., *et al.* Andromeda: a peptide search engine integrated into the MaxQuant environment.  
1043 *J Proteome Res* **10**, 1794-1805 (2011).
- 1044 50. Tyanova, S., *et al.* The Perseus computational platform for comprehensive analysis of  
1045 (prote)omics data. *Nat Methods* **13**, 731-740 (2016).
- 1046 51. Shah, A.D., Goode, R.J.A., Huang, C., Powell, D.R. & Schittenhelm, R.B. LFQ-Analyst: An Easy-  
1047 To-Use Interactive Web Platform To Analyze and Visualize Label-Free Proteomics Data  
1048 Preprocessed with MaxQuant. *J Proteome Res* **19**, 204-211 (2020).
- 1049 52. Naffouje, R., *et al.* Anti-Tumor Potential of IMP Dehydrogenase Inhibitors: A Century-Long  
1050 Story. *Cancers* **11**(2019).
- 1051 53. Gunter, J.H., *et al.* Characterisation of inosine monophosphate dehydrogenase expression  
1052 during retinal development: differences between variants and isoforms. *The international*  
1053 *journal of biochemistry & cell biology* **40**, 1716-1728 (2008).

- 1054 54. Benjanuwattra, J., Chaiyawat, P., Pruksakorn, D. & Koonrunsesomboon, N. Therapeutic  
1055 potential and molecular mechanisms of mycophenolic acid as an anticancer agent. *Eur J*  
1056 *Pharmacol* **887**, 173580 (2020).
- 1057 55. Bentley, R. Mycophenolic Acid: a one hundred year odyssey from antibiotic to  
1058 immunosuppressant. *Chem Rev* **100**, 3801-3826 (2000).
- 1059 56. Drygin, D., Rice, W.G. & Grummt, I. The RNA polymerase I transcription machinery: an  
1060 emerging target for the treatment of cancer. *Annu Rev Pharmacol Toxicol* **50**, 131-156 (2010).
- 1061 57. Grummt, I. The nucleolus-guardian of cellular homeostasis and genome integrity.  
1062 *Chromosoma* **122**, 487-497 (2013).
- 1063 58. Pelletier, J., Thomas, G. & Volarevic, S. Ribosome biogenesis in cancer: new players and  
1064 therapeutic avenues. *Nat Rev Cancer* **18**, 51-63 (2018).
- 1065 59. Grummt, I. & Grummt, F. Control of nucleolar RNA synthesis by the intracellular pool sizes of  
1066 ATP and GTP. *Cell* **7**, 447-453 (1976).
- 1067 60. Huang, M. & Mitchell, B.S. Guanine nucleotide depletion mediates translocation of nucleolar  
1068 proteins, including RNA helicase A (DHX-9). *Nucleosides Nucleotides Nucleic Acids* **27**, 704-711  
1069 (2008).
- 1070 61. Orgaz, J.L., Herraiz, C. & Sanz-Moreno, V. Rho GTPases modulate malignant transformation of  
1071 tumor cells. *Small GTPases* **5**, e29019 (2014).
- 1072 62. Abrams, R. & Bentley, M. Biosynthesis of nucleic acid purines. II. Role of hypoxanthine and  
1073 xanthine compounds. *Arch Biochem Biophys* **58**, 109-118 (1955).
- 1074 63. Abrams, R. & Bentley, M. Biosynthesis of nucleic acid purines. I. Formation of guanine from  
1075 adenine compounds in bone marrow extracts. *Arch Biochem Biophys* **56**, 184-195 (1955).
- 1076 64. Lagerkvist, U., Reichard, P., Carlsson, B. & Grabosz, J. The biogenesis of pentosenucleic acid  
1077 pyrimidines in the Ehrlich ascites tumor. *Cancer Res* **15**, 164-169 (1955).
- 1078 65. Cheng, Y., Li, Y., Huang, X., Wei, W. & Qu, Y. Expression of EZH2 in uveal melanomas patients  
1079 and associations with prognosis. *Oncotarget* **8**, 76423-76431 (2017).
- 1080 66. Kleer, C.G., *et al.* EZH2 is a marker of aggressive breast cancer and promotes neoplastic  
1081 transformation of breast epithelial cells. *Proceedings of the National Academy of Sciences of*  
1082 *the United States of America* **100**, 11606-11611 (2003).
- 1083 67. Xu, K., *et al.* EZH2 oncogenic activity in castration-resistant prostate cancer cells is Polycomb-  
1084 independent. *Science* **338**, 1465-1469 (2012).
- 1085 68. Li, H., Cai, Q., Godwin, A.K. & Zhang, R. Enhancer of zeste homolog 2 promotes the  
1086 proliferation and invasion of epithelial ovarian cancer cells. *Molecular cancer research : MCR*  
1087 **8**, 1610-1618 (2010).
- 1088 69. Schoumacher, M., *et al.* Uveal melanoma cells are resistant to EZH2 inhibition regardless of  
1089 BAP1 status. *Nature medicine* **22**, 577-578 (2016).
- 1090 70. Jin, B., *et al.* Verification of EZH2 as a druggable target in metastatic uveal melanoma.  
1091 *Molecular cancer* **19**, 52 (2020).
- 1092 71. Kim, W., *et al.* Targeted disruption of the EZH2-EED complex inhibits EZH2-dependent cancer.  
1093 *Nature chemical biology* **9**, 643-650 (2013).
- 1094 72. Terranova, C.J., *et al.* Reprogramming of bivalent chromatin states in NRAS mutant melanoma  
1095 suggests PRC2 inhibition as a therapeutic strategy. *Cell reports* **36**, 109410 (2021).
- 1096 73. Gunawan, M., *et al.* The methyltransferase Ezh2 controls cell adhesion and migration through  
1097 direct methylation of the extranuclear regulatory protein talin. *Nature immunology* **16**, 505-  
1098 516 (2015).
- 1099 74. Cantelli, G., *et al.* TGF-beta-Induced Transcription Sustains Amoeboid Melanoma Migration  
1100 and Dissemination. *Curr Biol* **25**, 2899-2914 (2015).
- 1101 75. Cornuel, J.F., Moraillon, A. & Gueron, M. Participation of yeast inosine 5'-monophosphate  
1102 dehydrogenase in an in vitro complex with a fragment of the C-rich telomeric strand.  
1103 *Biochimie* **84**, 279-289 (2002).

- 1104 76. McLean, J.E., *et al.* Inosine 5'-monophosphate dehydrogenase binds nucleic acids in vitro and  
1105 in vivo. *Biochem J* **379**, 243-251 (2004).
- 1106 77. Mortimer, S.E. & Hedstrom, L. Autosomal dominant retinitis pigmentosa mutations in inosine  
1107 5'-monophosphate dehydrogenase type I disrupt nucleic acid binding. *Biochem J* **390**, 41-47  
1108 (2005).
- 1109 78. Bowne, S.J., *et al.* Spectrum and frequency of mutations in IMPDH1 associated with autosomal  
1110 dominant retinitis pigmentosa and leber congenital amaurosis. *Invest Ophthalmol Vis Sci* **47**,  
1111 34-42 (2006).
- 1112 79. Kozhevnikova, E.N., *et al.* Metabolic enzyme IMPDH is also a transcription factor regulated by  
1113 cellular state. *Molecular cell* **47**, 133-139 (2012).
- 1114 80. Chang, T.S., Chao, S.Y. & Ding, H.Y. Melanogenesis inhibition by homoisoflavavone sappanone  
1115 A from *Caesalpinia sappan*. *Int J Mol Sci* **13**, 10359-10367 (2012).
- 1116 81. Jayaram, H.N., Cooney, D.A., Grusch, M. & Krupitza, G. Consequences of IMP dehydrogenase  
1117 inhibition, and its relationship to cancer and apoptosis. *Curr Med Chem* **6**, 561-574 (1999).
- 1118 82. Wright, D.G., *et al.* Tiazofurin effects on IMP-dehydrogenase activity and expression in the  
1119 leukemia cells of patients with CML blast crisis. *Anticancer Res* **16**, 3349-3351 (1996).
- 1120 83. Carter, S.B., *et al.* Mycophenolic acid: an anti-cancer compound with unusual properties.  
1121 *Nature* **223**, 848-850 (1969).
- 1122 84. Sweeney, M.J., *et al.* Experimental antitumor activity and preclinical toxicology of  
1123 mycophenolic acid. *Cancer Res* **32**, 1795-1802 (1972).
- 1124 85. Sobiak, J., Kaminska, J., Glyda, M., Duda, G. & Chrzanowska, M. Effect of mycophenolate  
1125 mofetil on hematological side effects incidence in renal transplant recipients. *Clin Transplant*  
1126 **27**, E407-414 (2013).
- 1127 86. Staatz, C.E. & Tett, S.E. Pharmacology and toxicology of mycophenolate in organ transplant  
1128 recipients: an update. *Arch Toxicol* **88**, 1351-1389 (2014).
- 1129 87. Bremer, S., *et al.* Expression of IMPDH1 and IMPDH2 after transplantation and initiation of  
1130 immunosuppression. *Transplantation* **85**, 55-61 (2008).
- 1131 88. Jonsson, C.A. & Carlsten, H. Mycophenolic acid inhibits inosine 5'-monophosphate  
1132 dehydrogenase and suppresses immunoglobulin and cytokine production of B cells. *Int*  
1133 *Immunopharmacol* **3**, 31-37 (2003).
- 1134
- 1135

1136 **Main Figures**

1137 **Figure1.**

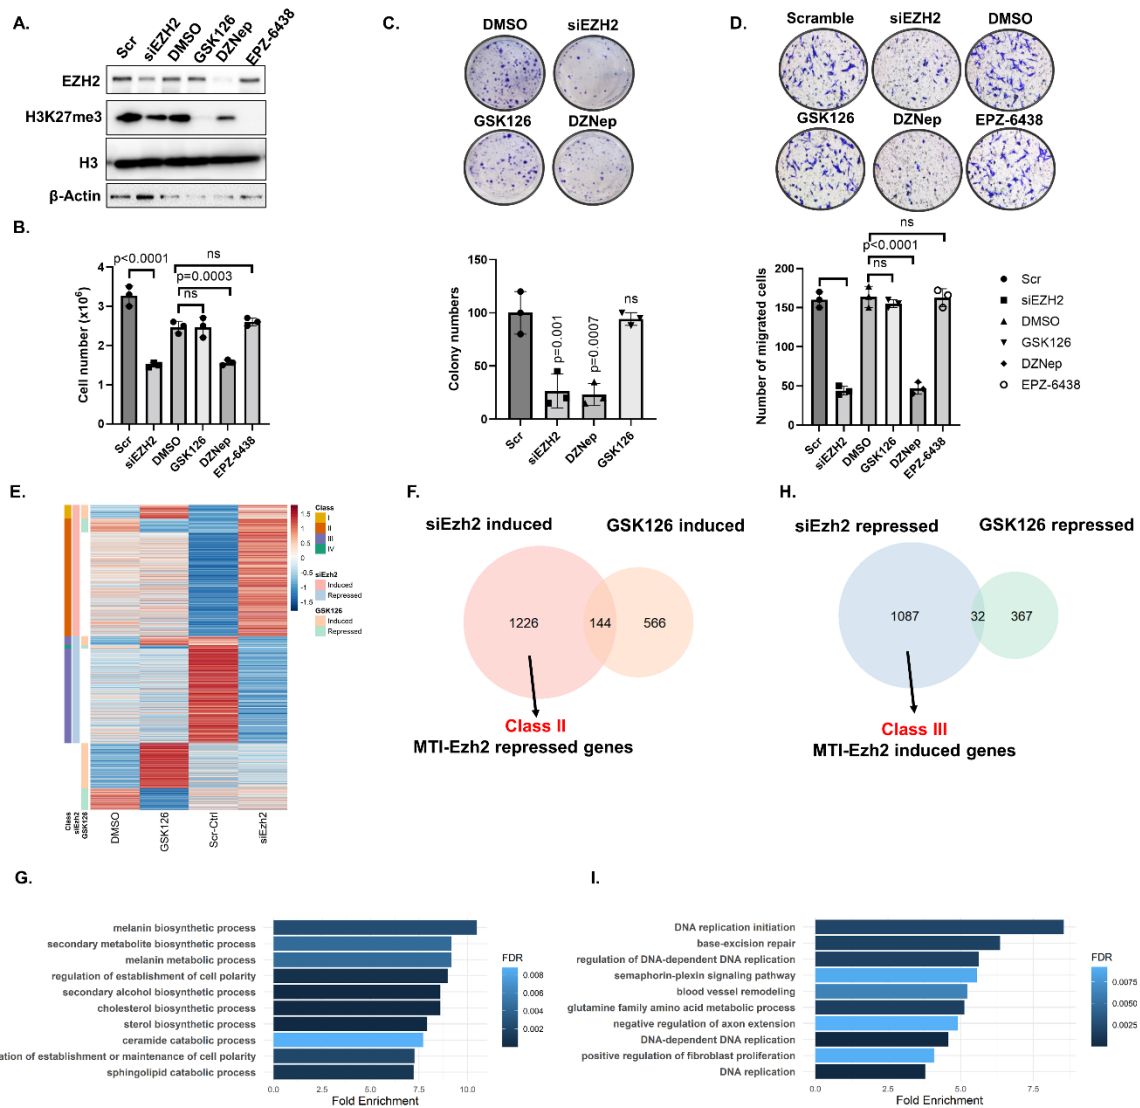

1138

1139 **Figure 1. Methylation-independent functions of EZH2 are predominant in**

1140 **melanoma.** A375 cells were treated with siEZH2, 2  $\mu$ M DZNep, 2  $\mu$ M GSK126, 2  $\mu$ M

1141 EPZ6438 and scramble or DMSO (control) for 3 days prior to: (A) Western blot analysis

1142 of EZH2, H3K27me3, H3 and  $\beta$ -Actin protein level, (B) cell growth analysis done by

1143 Trypan Blue haemocytometer counting, (C) clonogenicity after low-density seeding

1144 (crystal violet stain). Clonogenicity was assessed in pre-treated (3 days) cells seeded

1145 at 2000 cells in 6-well plate followed by crystal violet staining (0.5% in methanol) after

1146 incubation for 10 days in drug-free media. Representative images after crystal violet-

1147 stained wells were shown above bars (D) Boyden chamber migration was assessed

1148 in pre-treated (3 days) cells seeded at 50,000 cells in 24-well plate after incubation for

1149 24h. Representative images after crystal violet-stained wells were shown above bars.



1150 (E) B16-F10 cells were treated with either GSK126 versus vehicle control (DMSO) or  
1151 siEzh2 versus siCtrl and then profiled in triplicate RNAseq experiments. Genes that  
1152 were significantly up- or downregulated by siEzh2 compared with the control were  
1153 clustered across all samples and are shown as heatmaps. Each row represents one  
1154 gene and each column triplicate sample. The siEzh2-induced genes that were also  
1155 induced by GSK126 were termed class I genes and those unchanged by GSK126  
1156 class II genes. Genes that were activated by Ezh2 were defined as class III genes. (F)  
1157 Venn diagram showing overlap among si-Ezh2 induced and GSK126-induced genes  
1158 compiled from RNAseq experiment in G. (G) GO biological process analysis of 1226  
1159 class II genes. (H) Venn diagram showing overlap among si-Ezh2 repressed and  
1160 GSK126-repressed genes compiled from RNAseq experiment in G. (I) GO biological  
1161 process analysis of 1087 class III genes. Data for B-D are from three independent  
1162 experiments and are presented as mean  $\pm$ SD, analyzed by one-way ANOVA plus  
1163 Tukey's multiple comparison tests. ns: non-significant.

1164

1165 **Figure 2.**

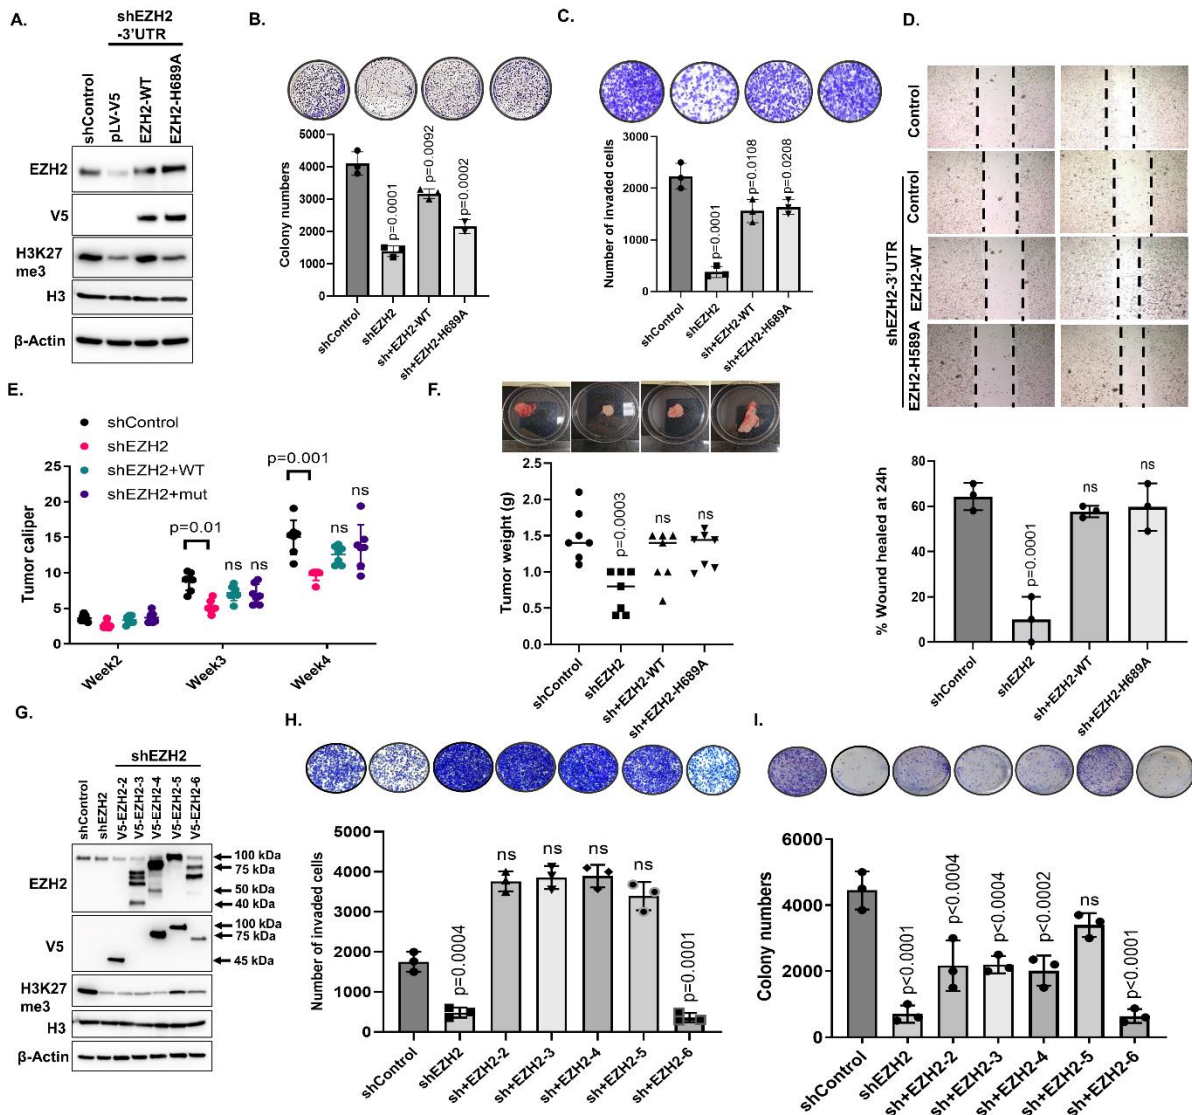

1166

1167 **Figure 2. EZH2 has methyltransferase independent function in melanoma**

1168 **tumorigenicity and invasion.** (A) Western blot analysis of A375 cells showing EZH2

1169 knockdown after lentiviral transduction with control shRNA (shControl) or 3' UTR

1170 EZH2-targeting shRNA (shEZH2) and rescue with V5-tagged WT-EZH2 or

1171 methyltransferase deficient H689A-EZH2. (B) Clonogenicity assay of cells described

1172 in A. Representative images after crystal violet-stained wells were shown above bars.

1173 (C) Matrigel-coated Boyden chamber invasion assay of cells described in A.

1174 Representative images after crystal violet staining were shown above bars. (D) Wound

1175 healing assay of cells described in A. Representative images of the wound after 24 h

1176 shown above bars. (E) Tumor caliper of A375 xenografts as described in A. (F) Tumor

1177 weights of A375 xenografts at the end point. Representative tumors per group were



1178 shown above bars. (G) Western blot analysis, (H) invasion, (I) clonogenicity of A375  
1179 cells with EZH2 knockdown followed by rescue with V5-tagged EZH2 deletion mutant  
1180 vectors. Data for B-D, H, I are from at least three independent experiments and are  
1181 presented as mean  $\pm$ SD, analyzed by one-way ANOVA plus Tukey's multiple  
1182 comparison tests. Data for E, F are from 7 mice per group and are presented as mean  
1183  $\pm$ SD, analyzed by two-way ANOVA plus Tukey's multiple comparison tests. ns: non-  
1184 significant.

1185

1186 **Figure 3.**

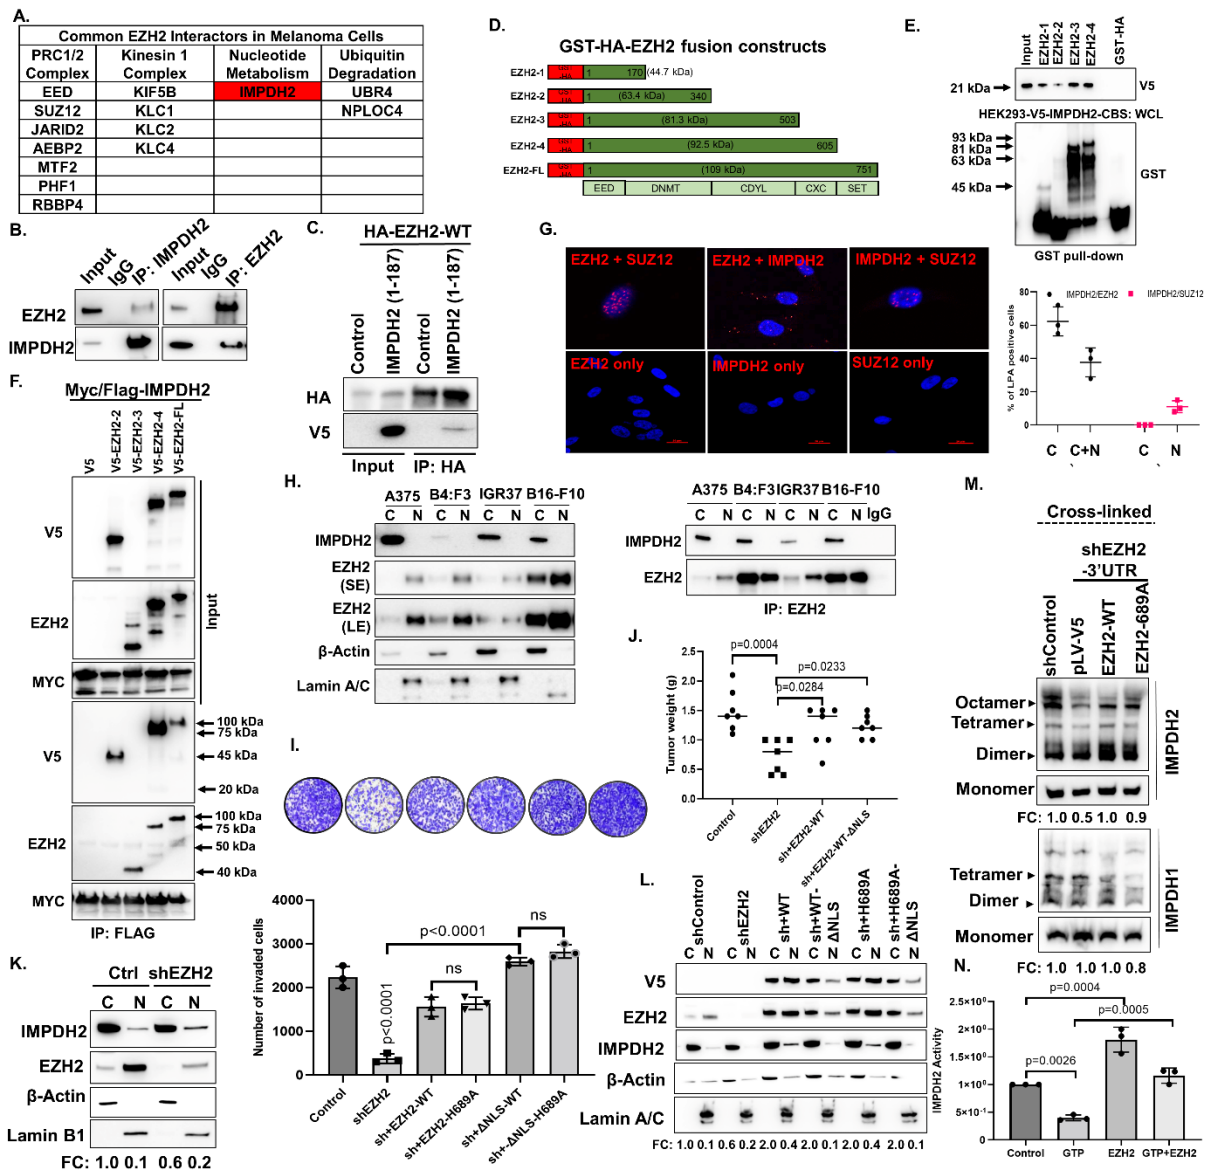

1187

1188 **Figure 3. Cytosolic EZH2 interacts with IMPDH2 through the IMPDH2-CBS**

1189 **domain and moves IMPDH2 to cytoplasm/ increases its tetramerization-**

1190 **mediated activity.** A) List of overlapping proteins co-immunoprecipitated (Co-IP) with

1191 EZH2 from C006-M1, LM-MEL-28:B4:F3, IGR37, A375 and LM-MEL-45 melanoma

1192 cells (all data derived from n=3 biological replicates). (B) The interaction between

1193 endogenous EZH2 and IMPDH2 was determined in A375 cells by immunoprecipitation

1194 (IP) with anti-IMPDH2 and anti-EZH2 antibody followed by western blotting with anti-

1195 EZH2 and anti-IMPDH2 antibody. (C) HA-tagged EZH2-WT and V5-tagged IMPDH2

1196 (1-187) were co-expressed in A375 cells. The interaction between overexpressed

1197 EZH2 and IMPDH2 (1-187) was determined by immunoprecipitation with anti-HA

1198 antibody followed by western blotting with anti-V5 antibody. (D) GST-EZH2 deletion

1199 mutant constructs. (E) The binding of V5-IMPDH2-CBS protein to GST-EZH2  
1200 peptides was probed with WB using the V5 specific antibody. Total cell lysate from  
1201 HEK293 overexpressing V5-IMPDH2-CBS was used as a source of IMPDH2-CBS in  
1202 GST-pull-down experiment. (F) The binding of Myc/Flag tagged full length IMPDH2  
1203 protein to V5 tagged EZH2 deletion mutant peptides (shown in Fig. 2G) was shown by  
1204 co-IP with anti-Flag antibody followed by probing with anti-V5 antibody. (G) Ligation  
1205 proximity images depicting co-localization with EZH2 and IMPDH2 by red fluorescent  
1206 dots A375 cells. Scale bar=10  $\mu$ m. Number of interaction loci depicted as red dots  
1207 were counted for cytoplasm and nucleus of total of 100 cell. (H) Cytosolic/Nuclear  
1208 fractionation was done for A375, B4:F3, IGR37, B16-F10 cells followed by IP with anti-  
1209 EZH2 antibody followed by western blotting with anti-EZH2 and anti-IMPDH2 antibody  
1210 (right). Lamin A/C is nuclear, and  $\beta$ -Actin is cytosolic marker. Inputs were shown on  
1211 the left. (I) Matrigel-coated Boyden chamber invasion assay of A375 cells showing  
1212 EZH2 knockdown after lentiviral transduction with control shRNA (shControl) or 3' UTR  
1213 EZH2-targeting shRNA (shEZH2) and rescue with V5-WT-EZH2 or V5-EZH2-H689A,  
1214 V5-EZH2- $\Delta$ NLS-WT and V5-EZH2- $\Delta$ NLS-H689A. Representative images after crystal  
1215 violet staining were shown above bars. (J) Tumor weights of indicated A375 xenografts  
1216 (n=7) at the end point. (K) Cytosolic/Nuclear fractionation was done from A375 cells  
1217 with control shRNA (shControl) or 3' UTR EZH2-targeting shRNA followed by IP with  
1218 anti-EZH2 antibody followed by western blotting with anti-EZH2 and anti-IMPDH2  
1219 antibody. Lamin A/C is nuclear, and  $\beta$ -Actin is cytosolic marker. (L) Cytosolic/Nuclear  
1220 fractionation was done from cells described in (I) followed by western blotting with anti-  
1221 V5, anti-EZH2, anti-IMPDH2 antibody and  $\beta$ -Actin antibody. (M) The clusters of  
1222 IMPDH2 and IMPDH1 tetramer were detected from cross-linked whole-cell extracts  
1223 isolated from cells described in Figure 2A. (N) Relative IMPDH2 activity measured by  
1224 NADH absorbance at OD340nm. 2  $\mu$ g of recombinant IMPDH2 was preincubated with  
1225 and 3 mM IMP and 2  $\mu$ g of recombinant EZH2 and then 10mM GTP was added for 10  
1226 min prior to reaction initiation by with 1 mM NAD<sup>+</sup>. Data for I, J and N is from three  
1227 independent experiments and are presented as mean  $\pm$ SD, analyzed by one-way  
1228 ANOVA plus Tukey's multiple comparison tests. ns: non-significant.

1229

1230 **Figure 4.**

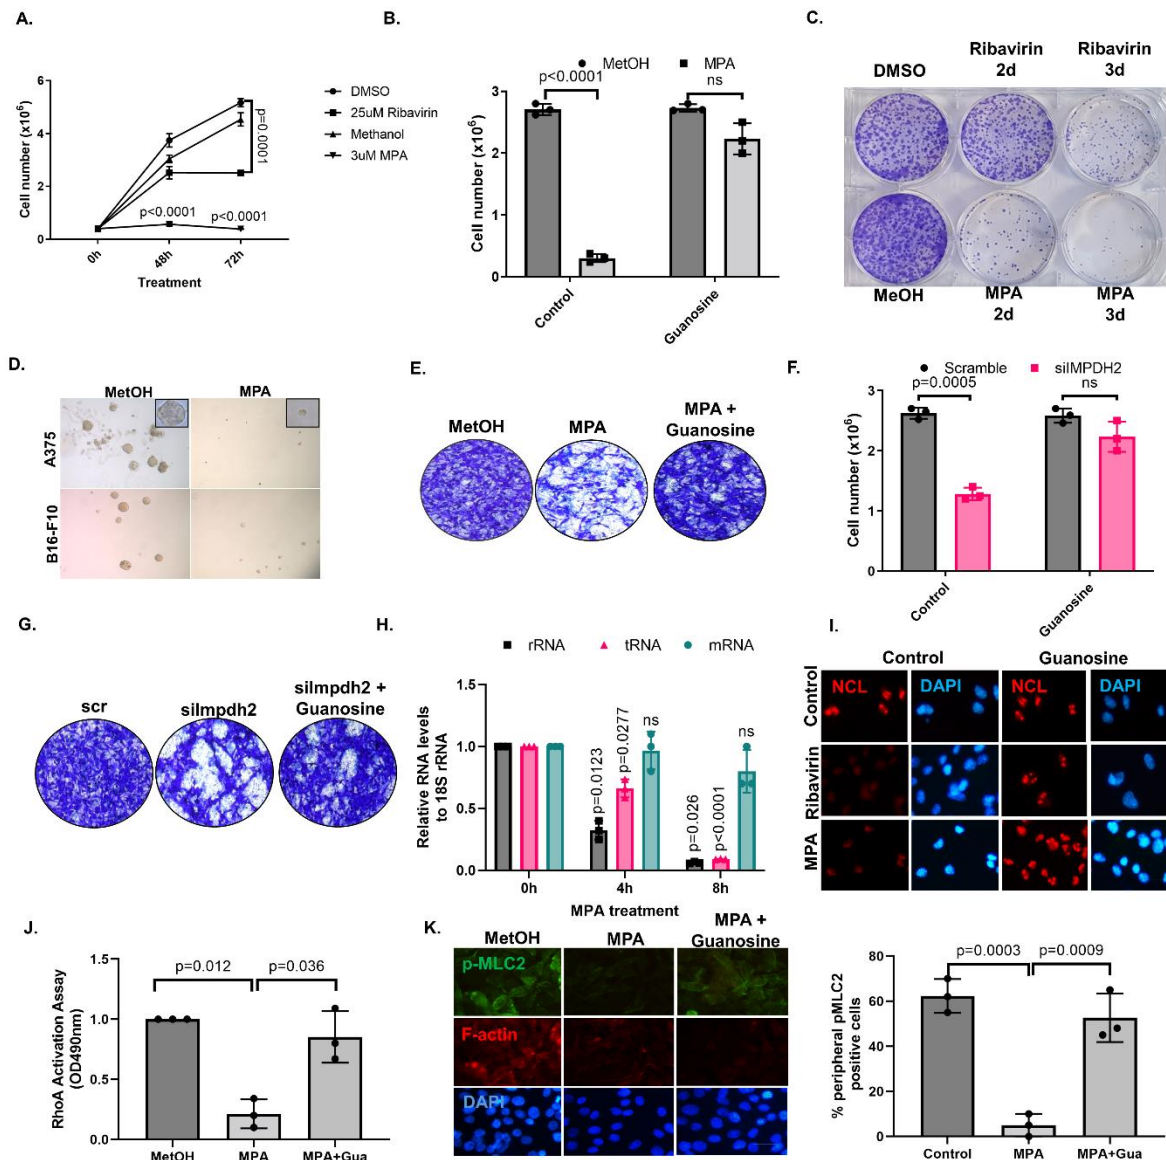

1231

1232 **Figure 4. IMPDH2 induces clonogenicity/ invasion in melanoma cells by**

1233 **regulating ribosome biogenesis and actomyosin contractility via cellular GTP**

1234 **level regulation.** (A) Time-dependent growth curves of A375 cells upon 25  $\mu$ M

1235 Ribavirin or DMSO (control); 3  $\mu$ M MPA, or methanol (Control). (B) A375 cell growth

1236 analysis done by Trypan Blue haemocytometer counting after treated with 3  $\mu$ M MPA

1237 or methanol control with the addition of 100  $\mu$ M guanosine or vehicle control for 3 days.

1238 (C) Clonogenicity assay of A375 cells described in A. Clonogenicity was assessed in

1239 pre-treated (2 and 3 days) cells seeded at 2000 cells in 6-well plate followed by crystal

1240 violet staining (0.5% in methanol) after incubation for 10 days in drug-free media.

1241 Representative images after crystal violet-stained wells were shown. (D) 3D matrigel

1242 clonogenicity assay of A375 and B16-F10 cells treated with 3  $\mu$ M MPA or methanol

1243 (control) for 10 days. (E) Matrigel-coated Boyden chamber invasion assay of cells  
1244 described in B. (F) Cell growth analysis done by Trypan Blue haemocytometer  
1245 counting after A375 cells were treated with siIMPDH2 or scramble control with the  
1246 addition of 100  $\mu$ M guanosine or vehicle control for 3 days. (G) Matrigel-coated Boyden  
1247 chamber invasion assay of cells described in F. (H) Nascent transcripts of the  
1248 indicated genes were analyzed by qRT-PCR after A375 cells were treated with 3  $\mu$ M  
1249 MPA for 0h, 4h and 8h. (I) IF staining with anti-NCL antibody in A375 cells treated with  
1250 25  $\mu$ M Ribavirin, 3  $\mu$ M MPA, or methanol (Control) with the addition of 100  $\mu$ M  
1251 guanosine or vehicle control for 24h. DAPI stains the nuclei. Scale bar: 20  $\mu$ m (J) RhoA  
1252 activity assay in A375 cells treated with 3  $\mu$ M MPA or methanol (Control) with the  
1253 addition of 100  $\mu$ M guanosine for 24h. (K) IF staining of A375 cells described in J with  
1254 anti-p-MLC2 (green) and phalloidin (red). DAPI stains the nuclei. Scale bar: 20  $\mu$ m. %  
1255 peripheral p-MLC2 positive cells were plotted on the right plot. Data for A, B, F, H, J  
1256 and K are from three independent experiments and are presented as mean  $\pm$ SD,  
1257 analyzed by one-way or two-way ANOVA plus Tukey's multiple comparison test. ns:  
1258 non-significant.

1259



1260 **Figure 5.**

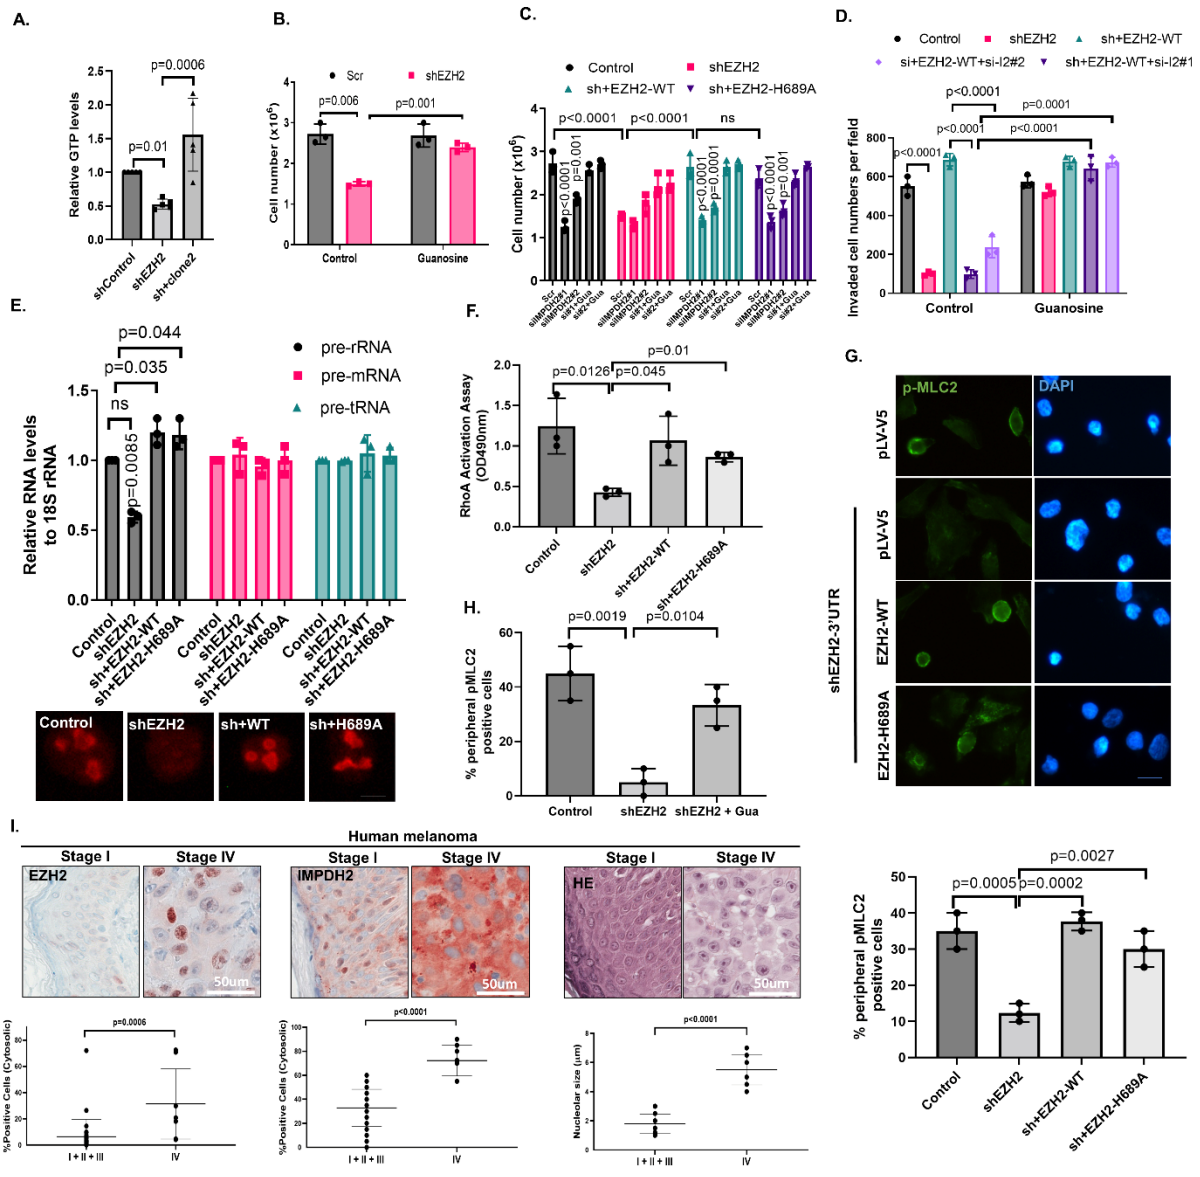

1261

1262

1263

1264

1265

1266

1267

1268

1269

1270

1271

1272

**Figure 5. EZH2 regulates clonogenicity/ invasion by regulating rRNA metabolism and Rho GTPase activity via GTP production in melanoma.** (A) Relative GTP levels were quantified by HPLC in A375 cells with stable EZH2 knockdown (shEZH2) and overexpression with V5-EZH2-clone2. (B) Cell growth analysis of A375 cells with stable EZH2 knockdown after 3 days of control or 100  $\mu$ M guanosine addition done by Trypan Blue haemocytometer counting. (C) Cell growth analysis done by Trypan Blue haemocytometer counting and (D) invasion assay counting done by crystal violet staining after A375 cells with stable EZH2 knockdown were rescued by V5-tagged WT-EZH2 or methyltransferase deficient H689A-EZH2 overexpression followed by scramble, si-IMPDPH2#1, or si-IMPDPH2#2 oligos and 100  $\mu$ M guanosine addition. (E) Nascent transcripts of the indicated genes were analyzed



1273 by qRT-PCR, (F) RhoA activity assay, (G) p-MLC2 IF in A375 cells showing EZH2  
1274 knockdown after lentiviral transduction with control shRNA (shControl) or 3' UTR  
1275 EZH2-targeting shRNA (shEZH2) and rescue with V5-tagged WT-EZH2 or  
1276 methyltransferase deficient H689A-EZH2. % Peripheral p-MLC2 positive cells were  
1277 plotted below images. (H) % peripheral p-MLC2 positive cells were plotted. (I) Human  
1278 melanoma samples from grade I to IV were stained with anti-EZH2 and anti-IMP2H2  
1279 antibodies. Grade I, II, III: n=31 grade IV: n=8. Nucleolar sizes were measured from  
1280 HE stained samples. Scale bar: 50  $\mu$ m. Data are presented as mean  $\pm$ SD, analyzed  
1281 by student t-test. Data for A-H are from three independent experiments and are  
1282 presented as mean  $\pm$ SD, analyzed by one-way or two-way ANOVA plus Tukey's  
1283 multiple comparison test. ns: non-significant.

1284

1285 **Figure 6.**

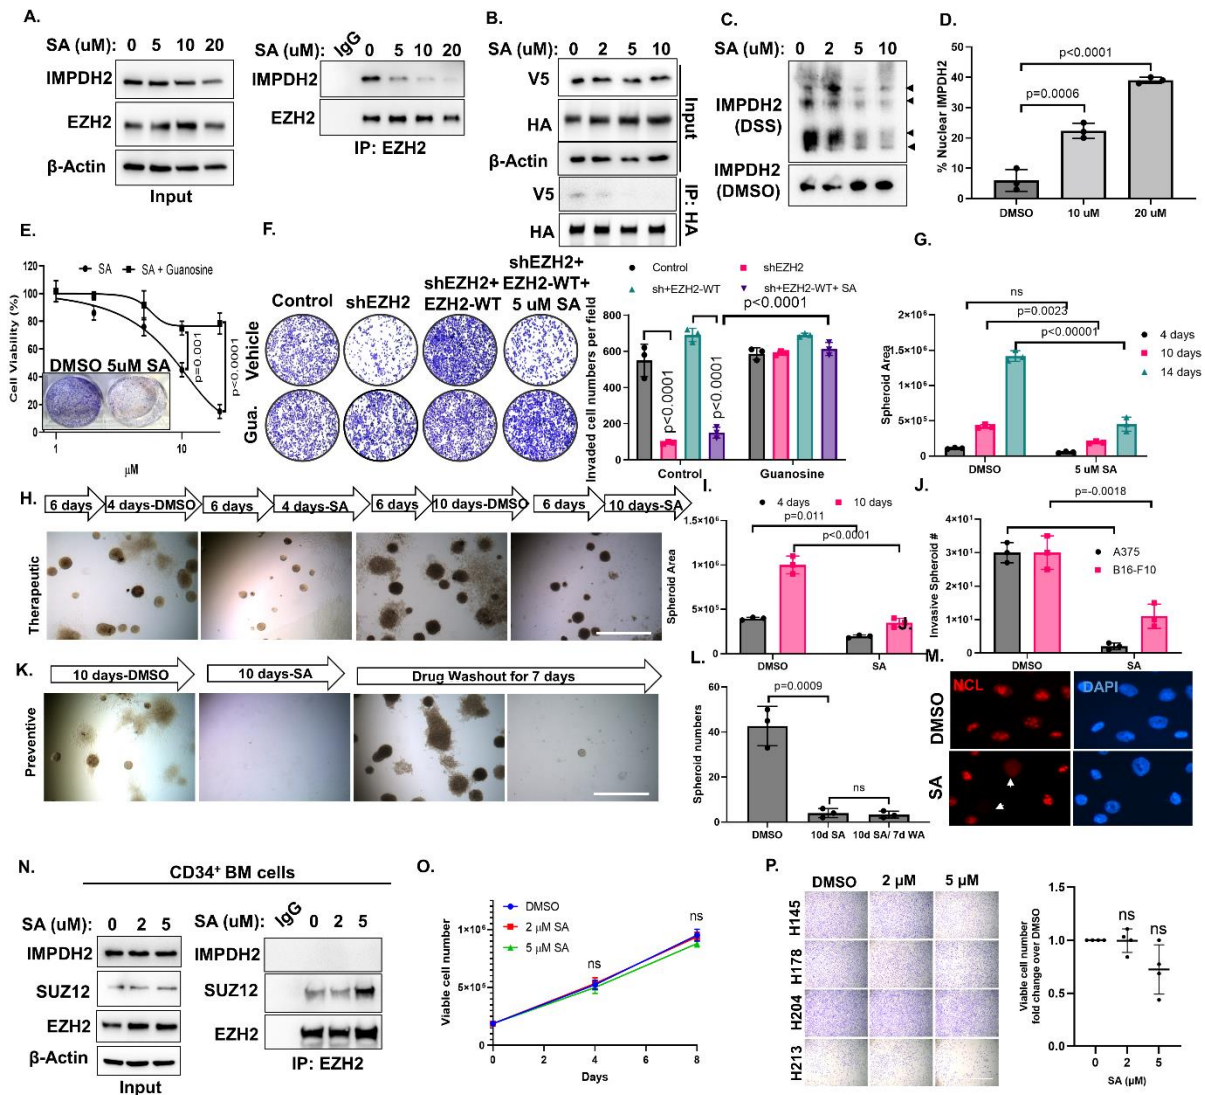

1286

1287 **Figure 6. Pharmacological inhibition of EZH2/IMPDH2 interactions by SA**

1288 **attenuates the growth and invasion abilities of melanoma cells *in vitro*.** (A) The

1289 interaction between endogenous EZH2 and IMPDH2 upon 16h SA treatment (DMSO,

1290 5, 10, 20  $\mu$ M) was determined in A375 cells by IP with anti-EZH2 antibody followed by

1291 WB with anti-EZH2 and anti-IMPDH2 antibody. The inputs were shown on the left. (B)

1292 The interaction between HA-EZH2 and V5-IMPDH2-CBS upon 16h SA treatment

1293 (DMSO, 2, 5, 10  $\mu$ M) was determined in A375 cells by IP with anti-HA antibody

1294 followed by WB with anti-V5 and anti-HA antibody. The inputs were shown above the

1295 IP blots. (C) The clusters of IMPDH2 tetramer were detected from cross-linked whole-

1296 cell extracts isolated from A375 cells treated with SA for 16h. (D) Cytosolic versus

1297 nuclear localizations of EZH2 and IMPDH2 were examined upon SA treatment in A375

1298 cells by Co-IF. % Nuclear IMPDH2 positive cells were plotted on the group. (E) Dose

1299 dependent cell growth curve of A375 cells treated with the indicated dose of SA and -  
1300 /+ 100  $\mu$ M guanosine for 3 days. Clonogenicity was shown in the inset. (F) Matrigel-  
1301 coated Boyden chamber invasion assay in A375 cells with stable EZH2 knockdown  
1302 and later rescued by V5-tagged WT-EZH2 overexpression followed by scramble, si-  
1303 IMPDH2#1, or si-IMPDH2#2 oligos and 100  $\mu$ M guanosine addition. (left), invaded cell  
1304 numbers per field were plotted on the right graph. (G) Spheroid areas of 3D colonies  
1305 grown for 4, 10, 14 days with DMSO or 5  $\mu$ M SA containing culture medium were  
1306 measured by Image J program. (H) Sphere formation in 3D Matrigel (therapeutic).  
1307 A375 cells were grown in Matrigel for 6 days in the absence of SA followed by 4d and  
1308 10d days with DMSO or 10  $\mu$ M SA. Spheroid areas were measured by Image J  
1309 program and presented in the graph (I). Invasive spheroid numbers were counted  
1310 manually and presented in the graph (J). (K) Sphere formation in 3D Matrigel  
1311 (preventive). A375 cells were grown in Matrigel for 10 days in presence of either  
1312 DMSO (control) or 10  $\mu$ M SA and then the colonies were grown 7 more days without  
1313 SA or DMSO and spheres were counted manually and presented in the graph (L). (M)  
1314 The effect of SA on ribosome biogenesis was measured in A375 cells treated with the  
1315 indicated doses of SA by anti-NCL antibody. DAPI stains the nuclei. Scale bar: 20  $\mu$ m.  
1316 (N) The effect of SA on EZH2 and IMPDH2 interaction was shown by Co-IP coupled  
1317 WB in CD34<sup>+</sup> BM cells. Cell growth analysis of CD34<sup>+</sup> bone marrow progenitor cells  
1318 (n=2 patients in triplicates) (O) and normal human melanocytes (n=4) (P) treated with  
1319 DMSO (vehicle), 2  $\mu$ M, or 5  $\mu$ M SA for the indicated time points. Data for D, E, F, G, I,  
1320 J and L are from three independent experiments and are presented as mean  $\pm$ SD,  
1321 analyzed by one-way or two-way ANOVA plus Tukey's multiple comparison test. ns:  
1322 non-significant.

1323

1324 **Figure 7.**

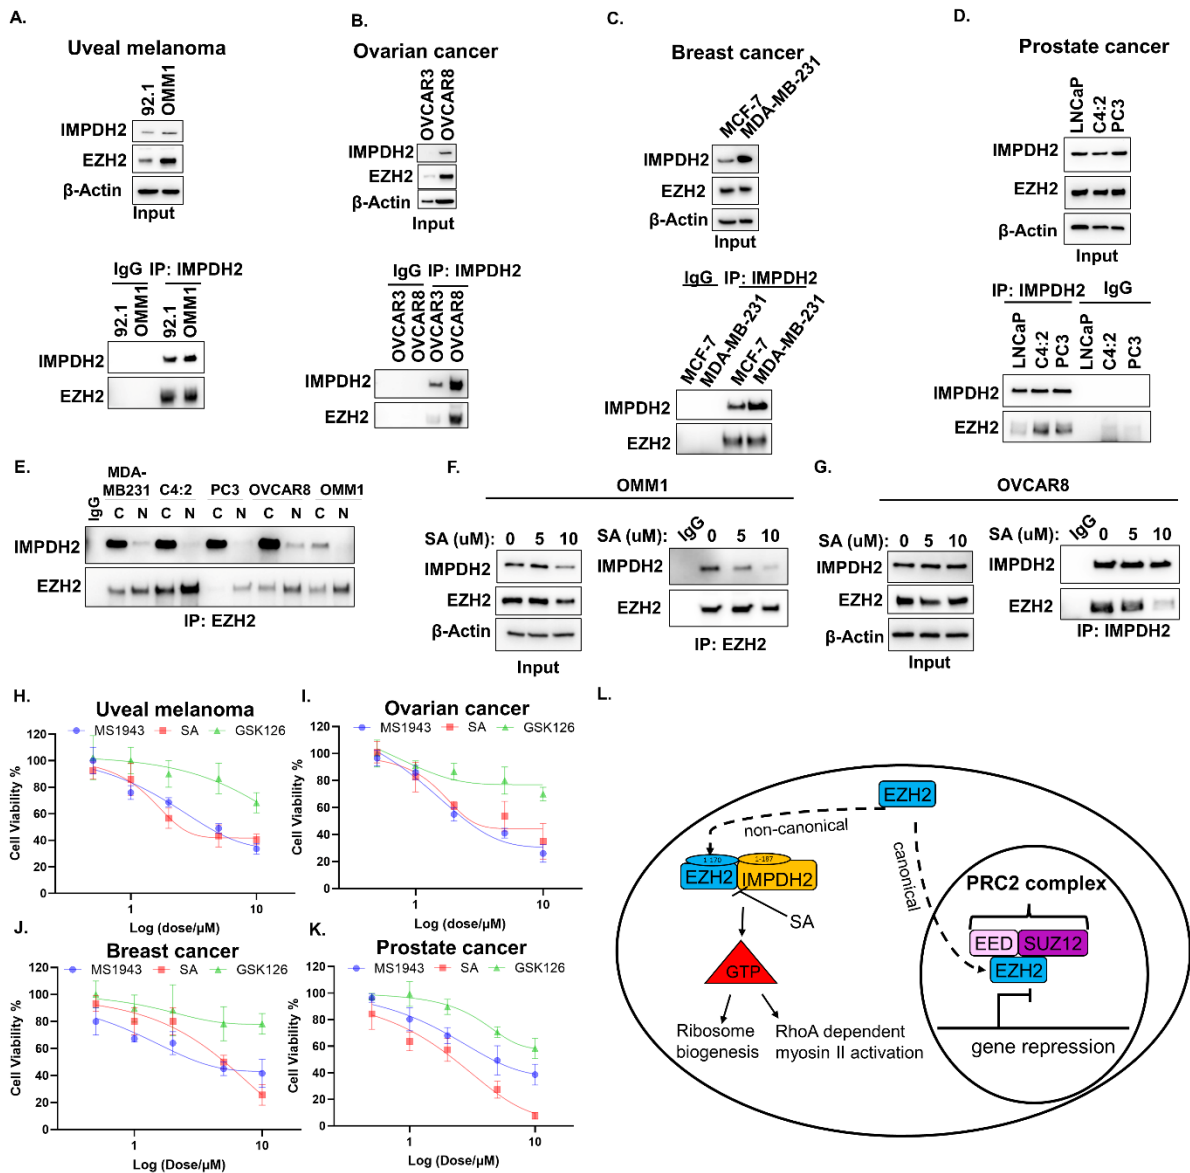

1325

1326 **Figure 7. EZH2-IMPDH2 interaction is commonly seen in uveal melanoma,**

1327 **breast, prostate, ovarian cancer, and SA attenuates their growth in *vitro*.** EZH2

1328 and IMPDH2 interaction was shown by IP with anti-IMPDH2 antibody followed by WB

1329 with anti-EZH2 and anti-IMPDH2 antibody in (A) uveal melanoma, (B) ovarian cancer,

1330 (C) breast cancer and (D) prostate cancer cell lines. Inputs were shown at the top of

1331 each Co-IP blots. (E) Cytosolic/Nuclear fractionation was done for MDA-MB-231, C4-

1332 2, PC3, OVCAR8 and OMM1 cells followed by IP with anti-EZH2 antibody followed by

1333 western blotting with anti-EZH2 and anti-IMPDH2 antibody. The effect of SA on EZH2

1334 and IMPDH2 interaction was shown by Co-IP coupled WB in (F) OMM1 and (G)

1335 OVCAR8 cells. Dose-dependent growth curves of (H) OMM1, (I) OVCAR8, (J) MDA-

1336 MB-231 and (K) C4:2 cells upon SA treatment for 3 days. (L) Proposed model

1337 depicting both canonical nuclear and non-canonical cytosolic functions of EZH2 as an  
1338 epigenetic silencer and as GTP regulator via IMPDH2 interaction, which can be  
1339 blocked by SA. EZH2 induces tumorigenicity and metastasis in melanoma by  
1340 upregulating rRNA metabolism and RhoA dependent actomyosin contractility via GTP  
1341 production.

1342



1343 **Supplemental Figures**

1344 **Figure S1.**

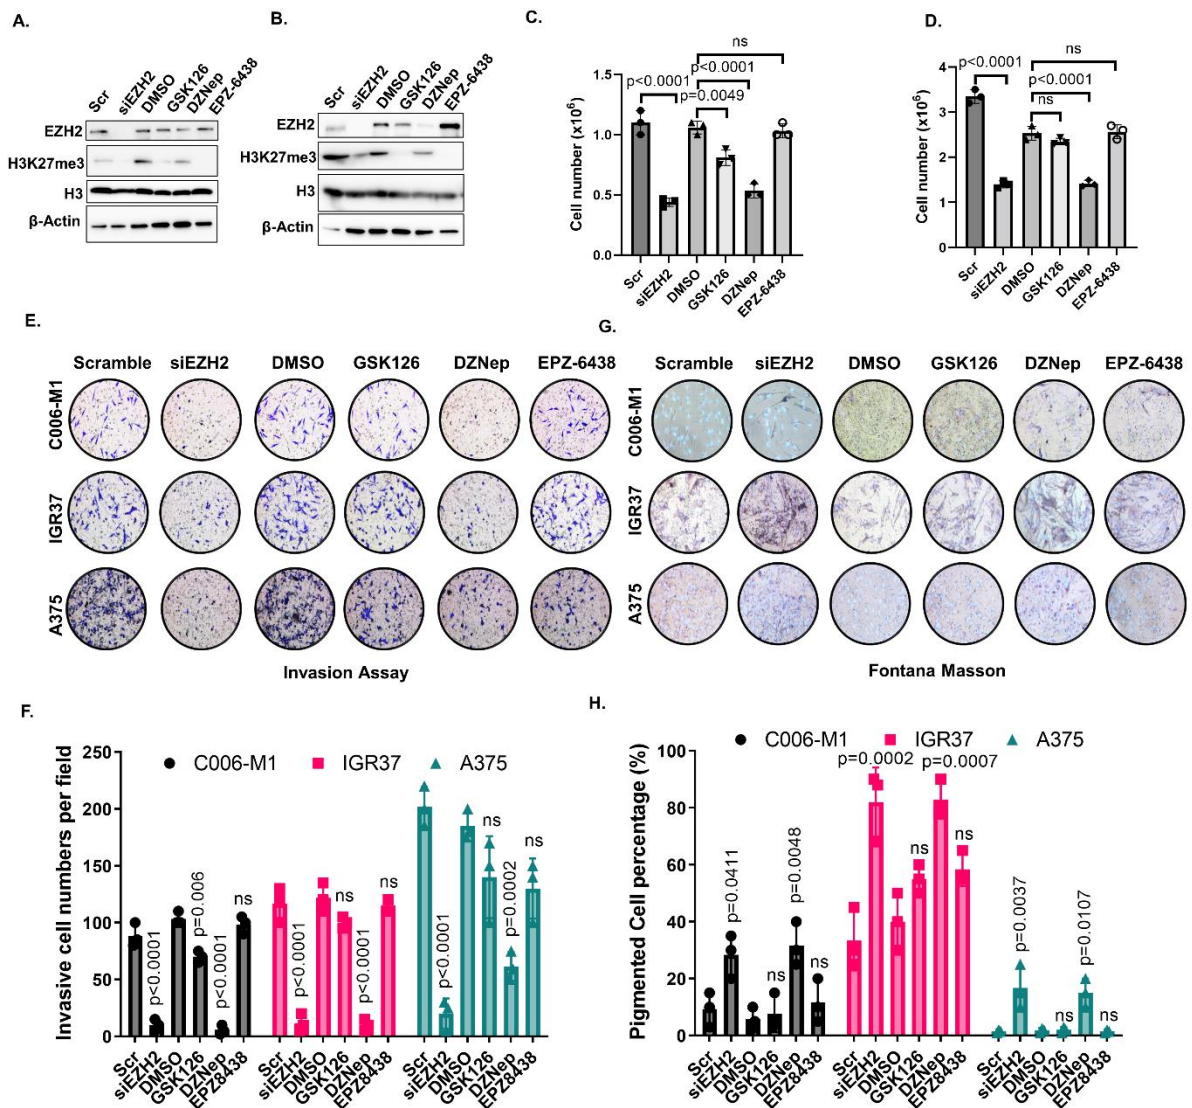

1345

1346

1347

1348

1349

1350

1351

1352

1353

1354

1355

1356

**Figure S1. Pharmacological inhibition of EZH2 abundance, but not its activity reduces melanoma cell growth/ invasion and induces pigmentation.** C006-M1 and IGR37 cells were treated with siEZH2, 2  $\mu$ M DZNep, 2  $\mu$ M GSK126, 2  $\mu$ M EPZ6438 and scramble or DMSO (control) for 3 days prior to: (A, B) Western blot analysis of EZH2, H3K27me3, H3 and  $\beta$ -Actin protein level, (C, D) cell growth analysis done by Trypan Blue haemocytometer counting, (E) Matrigel-coated Boyden chamber invasion assay was assessed in pre-treated (3 days) cells seeded at 100,000 cells in 24-well plate coated with matrigel after incubation for 24h. (F) Invaded cell counts per well were done by CV staining. (G) Cell pigmentation was assessed by Fontana Masson staining. (H) Pigmented cell percentages were calculated per well. Data for C, D, F and H are from three independent experiments and are presented as mean



1357  $\pm$ SD, analyzed by one-way ANOVA plus Tukey's multiple comparison test. ns: non-  
1358 significant.

1359

1360 **Figure S2.**

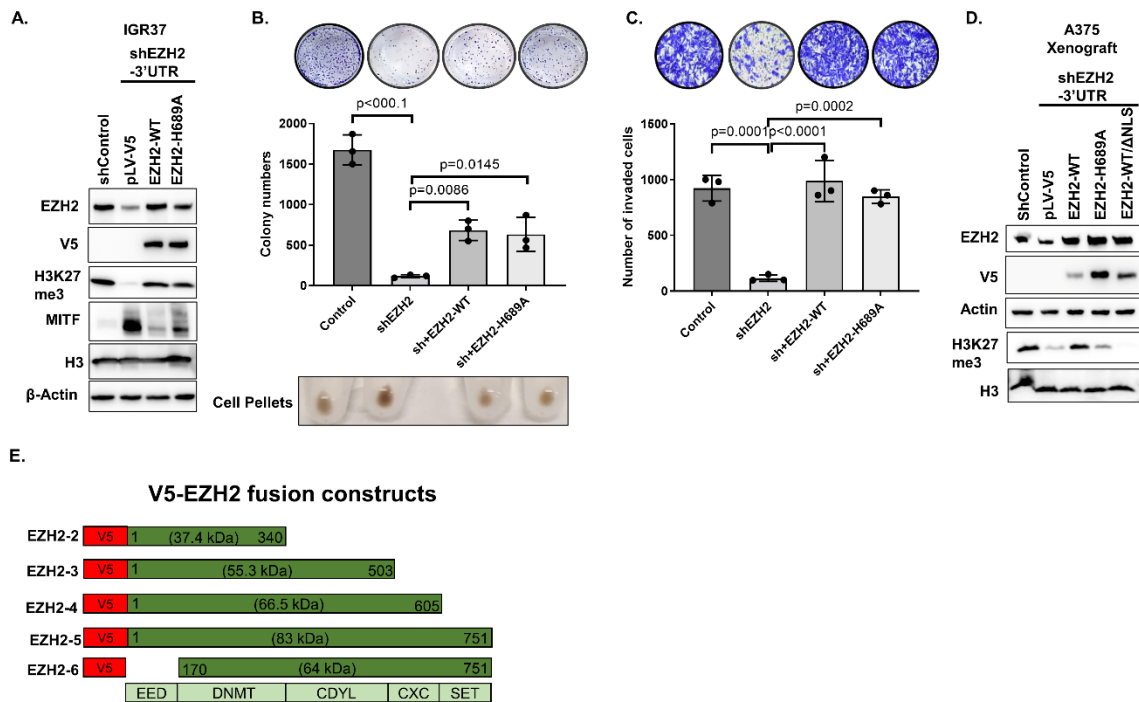

1361

1362 **Figure S2.** EZH2 has methyltransferase independent function in melanoma  
 1363 clonogenicity, invasion and pigmentation. (A) Western blot analysis of IGR37 cells  
 1364 showing EZH2 knockdown after lentiviral transduction with control shRNA (shControl)  
 1365 or 3' UTR EZH2-targeting shRNA (shEZH2) and rescue with V5-tagged WT-EZH2 or  
 1366 methyltransferase deficient H689A-EZH2. (B) Clonogenicity assay of cells described  
 1367 in A. Representative images after crystal violet-stained wells were shown above bars  
 1368 and representative images of cell pellets were shown below bars. (C) Matrigel-coated  
 1369 Boyden chamber invasion assay of cells described in A. Representative images after  
 1370 crystal violet staining were shown above bars. (D). Western blot analysis of EZH2, V5,  
 1371 H3K27me3, H3 and  $\beta$ -Actin from A375 xenograft tumor lysates. (E) V5-EZH2 deletion  
 1372 mutant constructs. Data for B, C are from three independent experiments and are  
 1373 presented as mean  $\pm$ SD, analyzed by one-way ANOVA plus Tukey's multiple  
 1374 comparison test.

1375

1376 **Figure S3.**

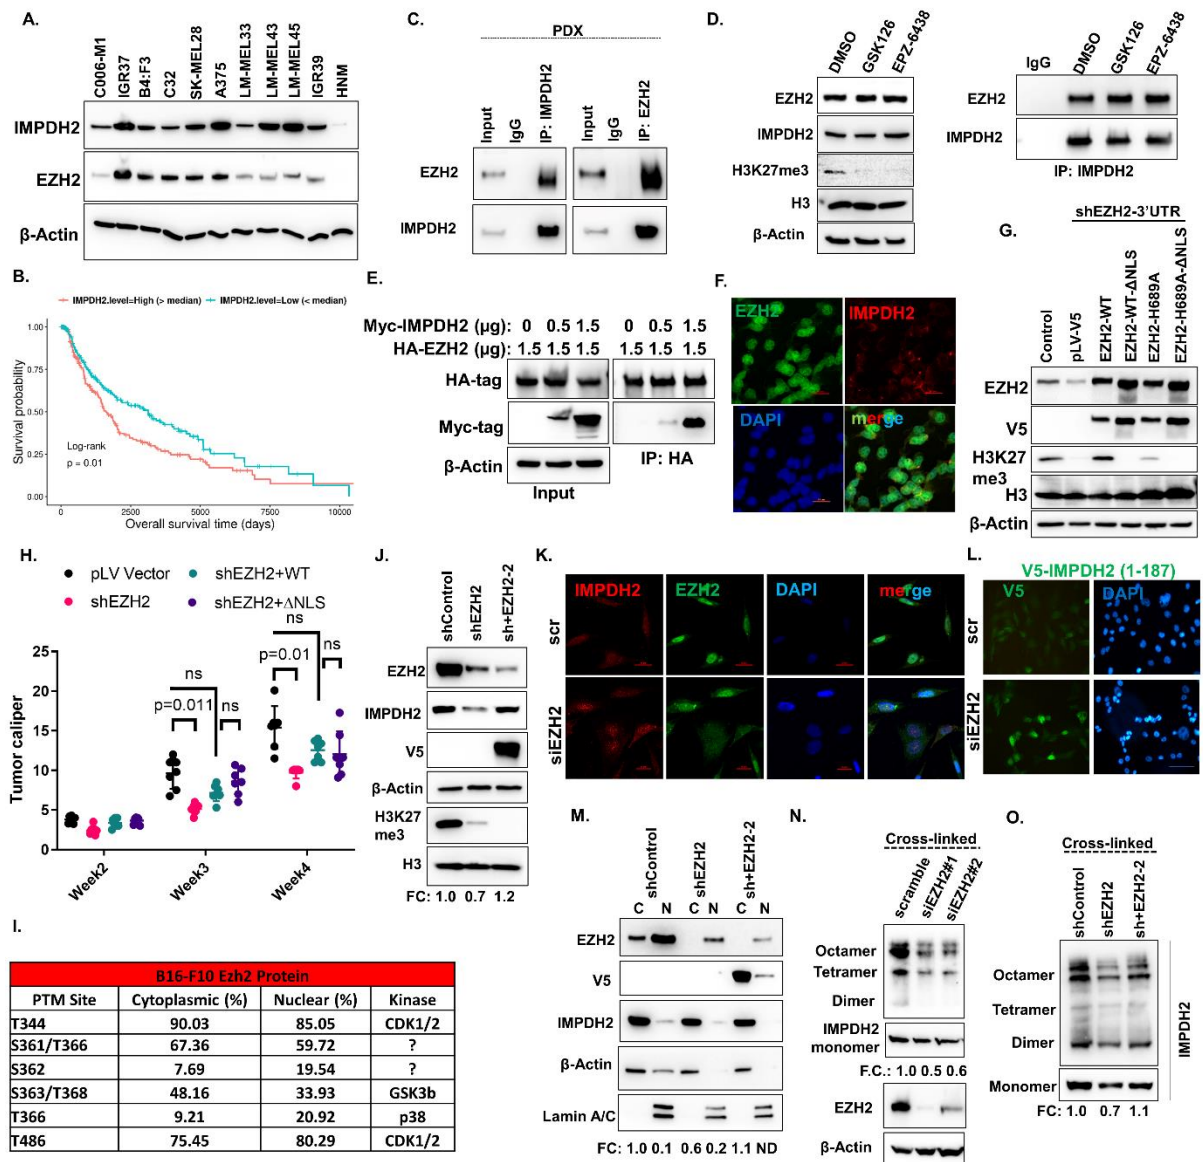

1377

1378 **Figure S3. EZH2 interacts with IMPDH2 and induces its tetramerization**

1379 **methyltransferase independently.** (A) Western blot analysis of EZH2, IMPDH2 and

1380  $\beta$ -Actin in C006-M1 (NRASQ61K), IGR37 (BRAFV600E), LM-MEL28: B4:F3

1381 (BRAFV600E), C32 (BRAFV600E), SK-MEL28 (BRAFV600E), A375 (BRAFV600E),

1382 LM-MEL33 (BRAFV600E), LM-MEL45 (BRAFV600E), IGR39 (BRAFV600E)

1383 melanoma cells and normal human melanocytes (NHM). (B) Kaplan-Meier curves of

1384 overall survival of TCGA PanCancer Atlas cutaneous melanoma patients (n = 392

1385 patients), stratified by IMPDH2 mRNA levels. Data were analyzed by log rank test. (C)

1386 The interaction between endogenous EZH2 and IMPDH2 was determined in PDX

1387 tumor lysates by IP with anti-IMPDH2 and anti-EZH2 antibody followed by WB with

1388 anti-EZH2 and anti-IMPDH2 antibody. (D) A375 cells were treated with DMSO

1389 (control), 2  $\mu$ M GSK126 or 2  $\mu$ M EPZ6438 for 2 days prior to: (A) Western blot analysis  
1390 of EZH2, H3K27me3, H3 and  $\beta$ -Actin (left) and interaction of EZH2/ IMPDH2 were  
1391 shown by IP with anti-IMPDH2 antibody followed by WB with EZH2 antibody. (E) HA-  
1392 tagged EZH2-WT and MYC/FLAG-tagged IMPDH2-WT were co-expressed in  
1393 HEK293 cells. The interaction between overexpressed EZH2 and IMPDH2 was  
1394 determined by immunoprecipitation with anti-HA antibody followed by western blotting  
1395 with anti-Myc-tag antibody. (F) Co-immunofluorescence (Co-IF) staining with anti-  
1396 EZH2 and anti-IMPDH2 antibodies. DAPI stains the nuclei. Scale bar: 20  $\mu$ m (G)  
1397 Western blot analysis of EZH2, V5, H3K27me3, H3 and  $\beta$ -Actin in A375 cells  
1398 described in Figure 3F. (H) Tumor calipers of indicated A375 xenografts (n=7) at the  
1399 end point. Data are presented as mean  $\pm$ SD, analyzed by two-way ANOVA plus  
1400 Tukey's multiple comparison test. ns: non-significant. (I) Cytosolic and nuclear Ezh2  
1401 phosphorylation sites and their percentages measured by LC-MS. Known kinases for  
1402 the corresponding phospho-sites were also included on the last column of the table.?:  
1403 Unknown kinases. (J) Western blot of of EZH2, V5, H3K27me3, H3 and  $\beta$ -Actin in  
1404 A375 cells with control shRNA (shControl) or 3' UTR EZH2-targeting shRNA and V5-  
1405 EZH2-clone2. (K) Co-IF staining with anti-EZH2 and anti-IMPDH2 antibodies in C006-  
1406 M1 cells treated with scramble control or siEZH2 for 3 days. DAPI stains the nuclei.  
1407 Scale bar: 20  $\mu$ m (L) IF staining with anti-V5 antibody in A375 cells harboring V5-  
1408 IMPDH2 (1-187) that was treated with scramble control or siEZH2 for 3 days. DAPI  
1409 stains the nuclei. Scale bar: 20  $\mu$ m. (M) Cytosolic/Nuclear fractionation was done from  
1410 A375 cells shown in J. Lamin A/C is nuclear, and  $\beta$ -Actin is cytosolic marker. The  
1411 clusters of IMPDH2 tetramer were measured after cross-linking of B16-F10 cells (N)  
1412 treated with or scramble control, siEzh2#1 or siEzh2#2 for 3 days and of A375 cells  
1413 shown in J (O).

1414

1415 **Figure S4.**

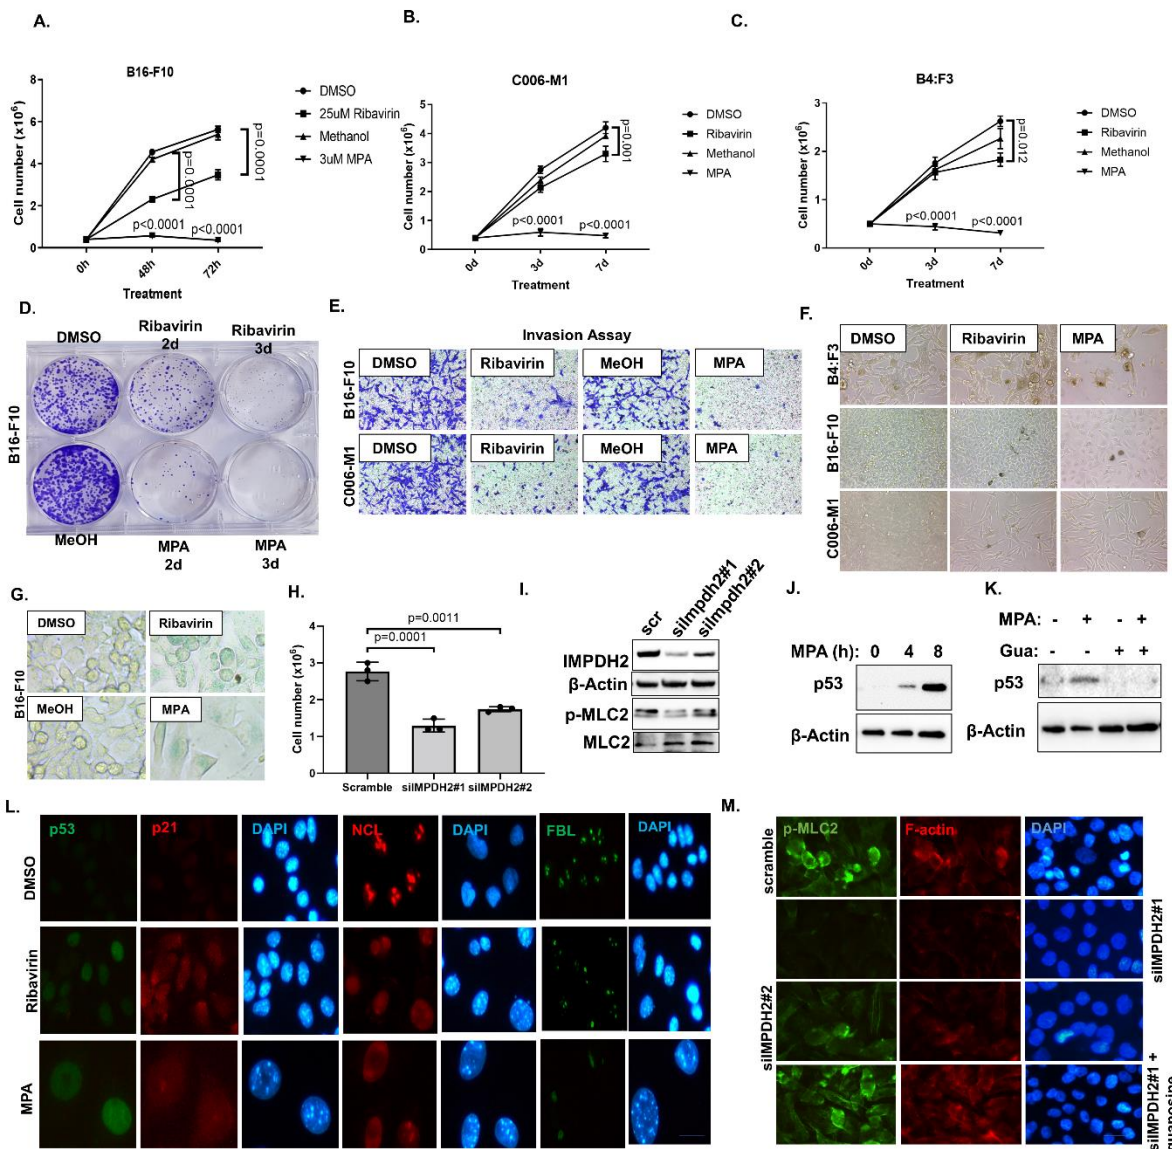

1416

1417 **Figure S4. Pharmacological or genetic inhibition of IMPDH2 reduces**

1418 **clonogenicity, invasion by p53 induction and ROCK-myosin II pathway**

1419 **activation.** Time-dependent growth curves of A375 (A), C006-M1 (B), B4:F3 (C) cells

1420 upon 25 μM Ribavirin or DMSO (control); 3 μM MPA, or methanol (Control). (D)

1421 Clonogenicity assay of B16-F10 cells described in A. (E) Matrigel-coated Boyden

1422 chamber invasion assay of cells described in A, B. (F) Bright field images of cells

1423 described in A, B, C. (G) B16-F10 cell senescence determined by β-gal staining

1424 (green). (H) Cell growth analysis done by Trypan Blue haemocytometer counting, (I)

1425 Western blot analysis of IMPDH2, β-Actin, p-MLC2 and MLC2 in A375 cells after

1426 treated with siIMPDH2#1, siIMPDH2#2 or scramble (control) for 3 days. (J, K) Western

1427 blot analysis of p53 and β-Actin in A375 cells with 0h, 4h, 8h 3 μM MPA treatment +/-

1428 100  $\mu$ M guanosine. (L) Co-IF staining of A375 cells treated with 25  $\mu$ M Ribavirin or  
1429 DMSO (control); 3  $\mu$ M MPA with anti-p53 (green) and anti-p21 (red) or anti-NCL (red),  
1430 anti-FBL (green). DAPI stains the nuclei. Scale bar: 100  $\mu$ m. (M) IF staining of A375  
1431 cells described in H with anti-p-MLC2 (green) and phalloidin (red). DAPI stains the  
1432 nuclei. Scale bar: 20  $\mu$ m. Data for A, B, C and H are from three independent  
1433 experiments and are presented as mean  $\pm$ SD, analyzed by one-way ANOVA plus  
1434 Tukey's multiple comparison test.

1435

1436



1437 **Figure S5.**

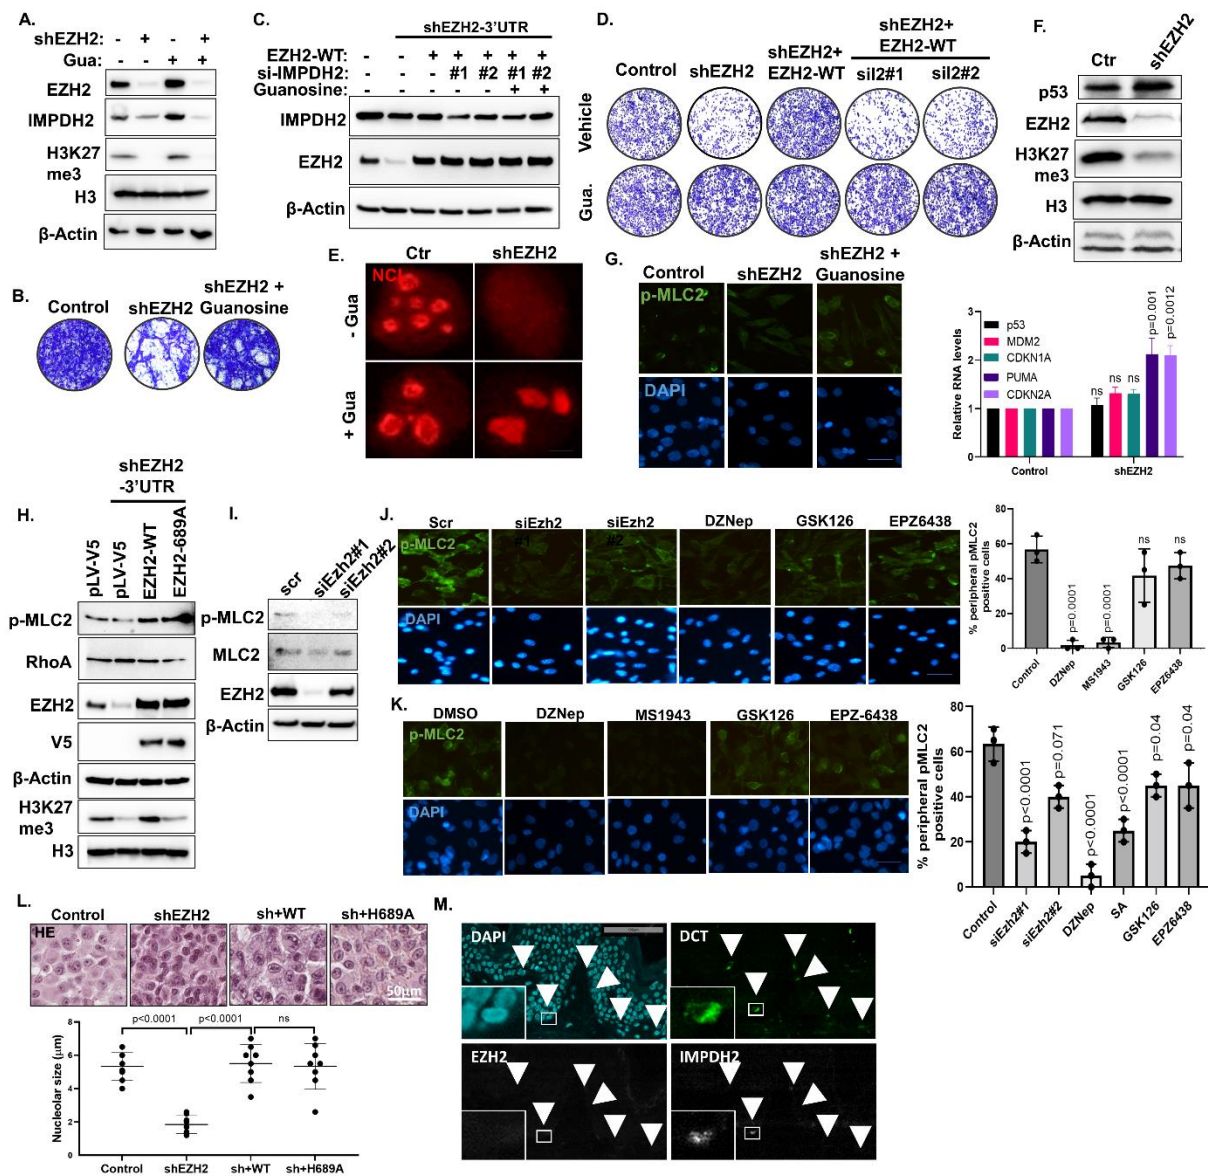

1438

1439 **Figure S5. EZH2 modulates ROCK-myosin II activity via Rho GTPase regulation**

1440 **in melanoma cells.** (A) Western blot analysis of EZH2, IMPDH2, H3K27me3, H3, β-

1441 Actin, (B) Matrigel-coated Boyden chamber invasion assay in A375 cells with stable

1442 EZH2 knockdown (shEZH2) +/- 100 μM guanosine for 3 days. (C) Western blot

1443 analysis of IMPDH2, EZH2 and β-Actin and (D) matrigel-coated Boyden chamber

1444 invasion assay in A375 cells with stable EZH2 knockdown and rescue with V5-tagged

1445 WT-EZH2 with scramble, si-IMPDH2#1, or si-IMPDH2#2 oligos and 100 μM

1446 guanosine addition. (E) IF staining with anti-NCL antibody in A375 cells with stable

1447 EZH2 knockdown (shEZH2) +/- 100 μM guanosine for 3 days. (F) Western blot

1448 analysis of p53, EZH2, H3K27me3, H3, β-Actin (top) and qRT-PCR of *p53*, *MDM2*,

1449 *PUMA*, *CDKN2A* (bottom) in A375 cells with stable EZH2 knockdown. (G) p-MLC2 IF

1450 in A375 cells with stable EZH2 knockdown (shEZH2) +/- 100  $\mu$ M guanosine for 2 days.  
1451 (H) Western blot analysis of p-MLC2, RhoA, EZH2, V5,  $\beta$ -Actin, H3K27me3 and H3 in  
1452 A375 cells showing EZH2 knockdown shRNA (shControl) or 3' UTR EZH2-targeting  
1453 shRNA (shEZH2) and rescue with V5-tagged WT-EZH2 or methyltransferase deficient  
1454 H689A-EZH2. (I) Western blot analysis of p-MLC2, MLC2, EZH2 and  $\beta$ -Actin in B16-  
1455 F10 cells treated with scramble (control), siEzh2#1, or siEzh2#2 for 3 days. IF staining  
1456 with anti-p-MLC2 antibody in B16-F10 (J) and A375 cells (K) treated with siEzh2#1,  
1457 siEzh2#2, 2  $\mu$ M DZNep, 2  $\mu$ M GSK126, or 2  $\mu$ M EPZ6438 for 2 days. DAPI stains the  
1458 nuclei. Scale bar: 20  $\mu$ m. % peripheral p-MLC2 positive cells were plotted next to the  
1459 images. (L) Nucleolar sizes were measured from HE stained xenograft samples (n=7)  
1460 obtained in Fig. 2F. Scale bar: 50  $\mu$ m. (M) Co-IF with anti-DCT (melanocyte marker),  
1461 anti-EZH2 and anti-IMPDH2 in normal human skin samples. Data for F, J, K and L are  
1462 from three independent experiments and are presented as mean  $\pm$ SD, analyzed by  
1463 one-way ANOVA plus Tukey's multiple comparison test. ns: non-significant.

1464

1465 **Figure S6.**

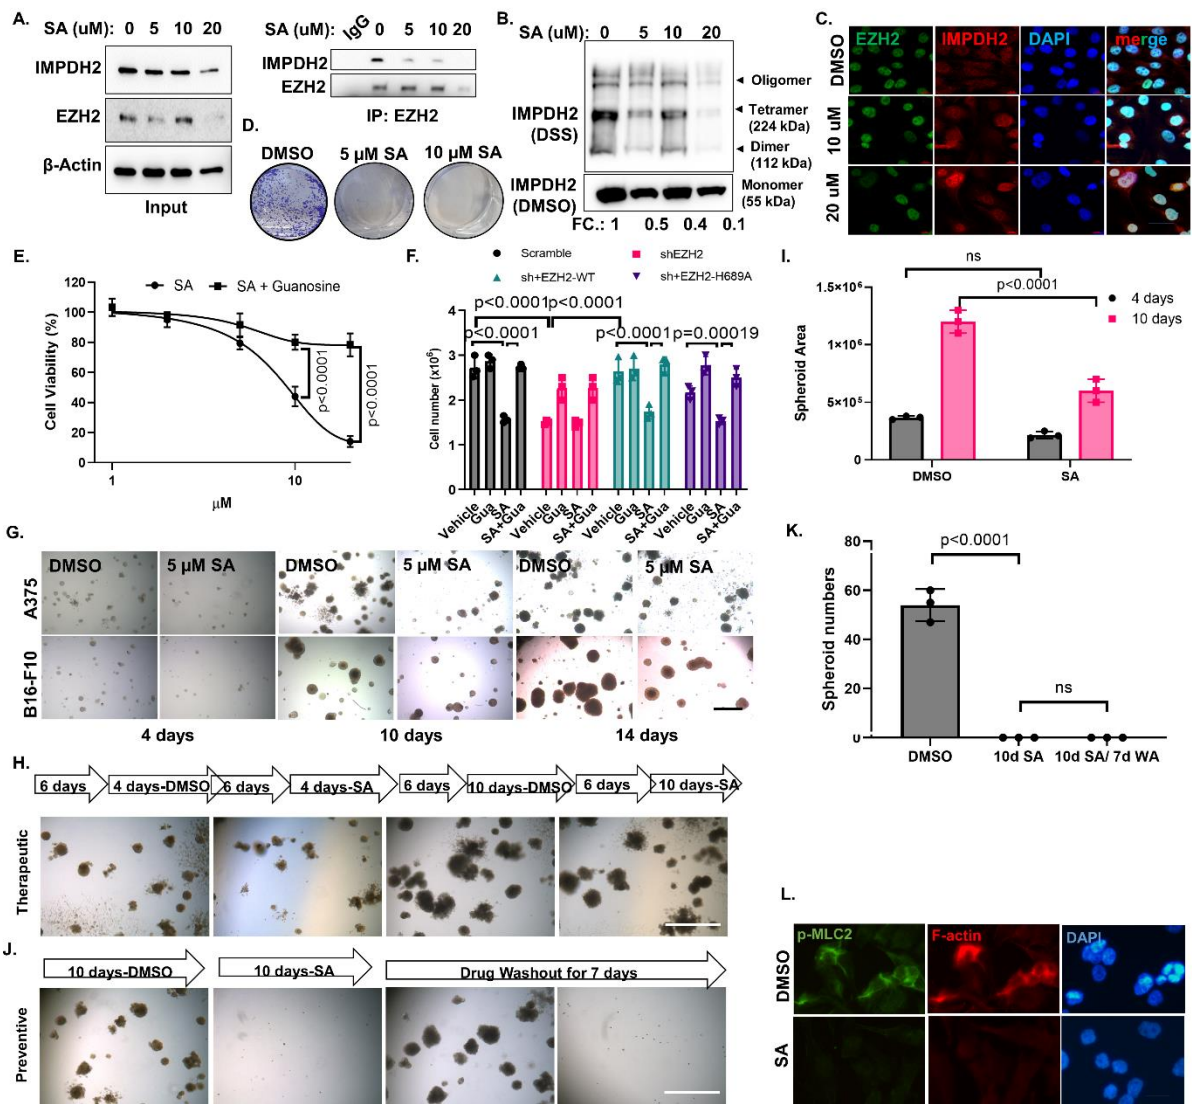

1466

1467 **Figure S6. SA reduces EZH2/IMPDH2 interaction, IMPDH2 tetramerization/**

1468 **nuclear translocation and attenuates the growth and invasion abilities of**

1469 **melanoma cells *in vitro*.** (A) The interaction between endogenous EZH2 and

1470 IMPDH2 upon 16h SA treatment (DMSO, 5, 10, 20 μM) was determined in B16-F10

1471 cells by Co-IP with anti-EZH2 antibody followed by WB with anti-EZH2 and anti-

1472 IMPDH2 antibody. The inputs were shown on the left. (B) The clusters of IMPDH2

1473 tetramer were detected from cross-linked whole-cell extracts isolated from B16-F10

1474 cells treated with indicated dose of SA for 16h. (C) Cytosolic versus nuclear

1475 localizations of EZH2 and IMPDH2 were examined upon SA treatment in A375 cells

1476 by Co-IF using anti-EZH2 (green) and anti-IMPDH2 (red) antibodies. DAPI stains the

1477 nuclei. Scale bar: 20 μm. (D) Clonogenic assay of A375 cells described in A. (E)

1478 Dose dependent cell growth curve of B16-F10 cells treated with the indicated doses

1479 of SA and +/- 100  $\mu$ M guanosine for 3 days. (F) Cell growth analysis of A375 cells with  
1480 stable EZH2 knockdown and rescue with V5-tagged WT-EZH2 or methyltransferase  
1481 deficient H689A-EZH2 followed by DMSO or 5  $\mu$ M SA and 100  $\mu$ M guanosine addition.  
1482 (G) Time dependent sphere formation in 3D Matrigel (preventive). A375 and B16-F10  
1483 cells were grown in Matrigel for 4 d, 10 d and 14 d in the presence of either DMSO  
1484 (control) or 5  $\mu$ M SA. (H) Sphere formation in 3D Matrigel (therapeutic). B16-F10 cells  
1485 were grown in Matrigel for 6 days in the absence of SA followed by 4d and 10d days  
1486 with DMSO or 10  $\mu$ M SA. Spheroid areas were measured by Image J program and  
1487 presented in the graph (I). (J) Sphere formation in 3D Matrigel (preventive). B16-F10  
1488 cells were grown in Matrigel for 10 days in presence of either DMSO (control) or 10  
1489  $\mu$ M SA and then the colonies were grown 7 more days without SA or DMSO and  
1490 spheres were counted manually and presented in the graph (K). (L) The effect of SA  
1491 on actomyosin contractility was measured in A375 cells treated with DMSO or 5  $\mu$ M  
1492 SA for 3 days with anti-p-MLC2 antibody (green)/ Phalloidin (red) IF. DAPI stains the  
1493 nuclei. Scale bar: 20  $\mu$ m. Data for E, F, I and K are from three independent  
1494 experiments and are presented as mean  $\pm$ SD, analyzed by one-way or two-way  
1495 ANOVA plus Tukey's multiple comparison test. ns: non-significant.

1496



1497 **Figure S7.**

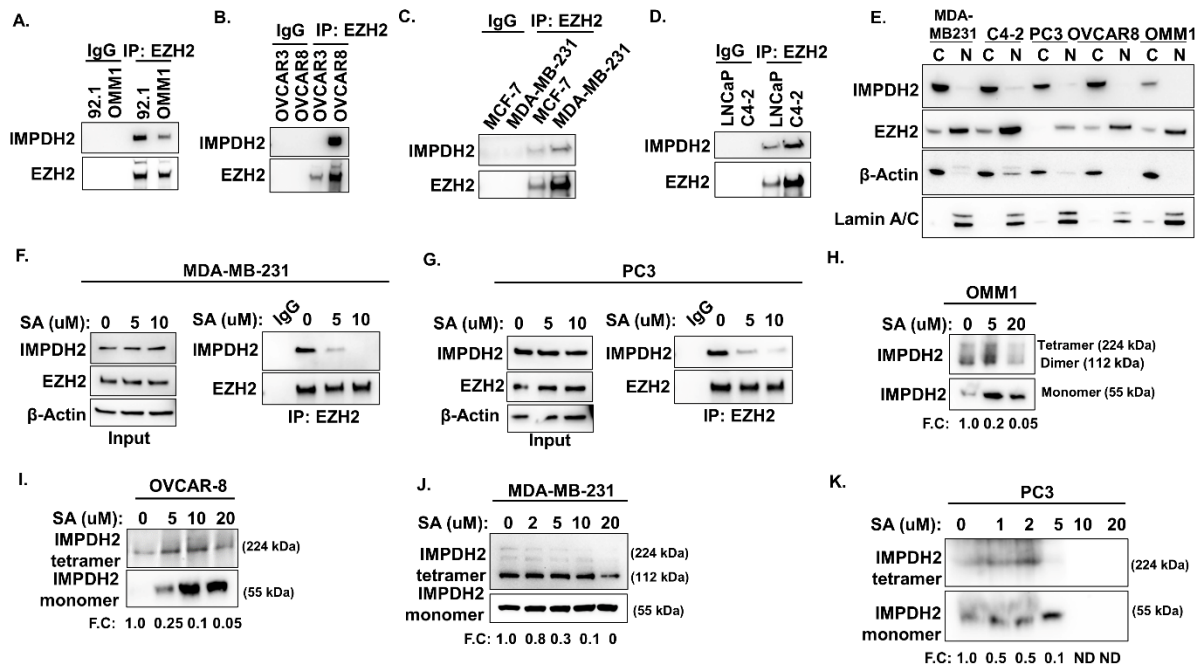

1498

1499 **Figure S7. Cytosolic EZH2-IMPDH2 interaction is seen in uveal melanoma,**  
 1500 **breast, prostate, ovarian cancer, and SA attenuates IMPDH2 tetramerization.**

1501 EZH2 and IMPDH2 interaction was shown by IP with anti-EZH2 antibody followed by  
 1502 WB with anti-EZH2 and anti-IMPDH2 antibody in (A) uveal melanoma, (B) ovarian  
 1503 cancer, (C) breast cancer and (D) prostate cancer cell lines. (E) Cytosolic/Nuclear  
 1504 fractionation was done for OMM1, OVCAR8, MDA-MD231 and C4:2 cells followed by  
 1505 IP with anti-IMPDH2 antibody followed by western blotting with anti-EZH2 and anti-  
 1506 IMPDH2 antibody. Lamin A/C is nuclear, and β-Actin is cytosolic marker. Inputs were  
 1507 shown above the IP blot. The effect of SA on EZH2 and IMPDH2 interaction was  
 1508 shown by Co-IP coupled WB in (F) MDA-MB-231 and (G) PC3 cells. The clusters of  
 1509 IMPDH2 tetramer were detected from cross-linked whole-cell extracts isolated from  
 1510 (H) OMM1, (I) OVCAR8, (J) MDA-MB-231 and (K) PC3 cells treated with the indicated  
 1511 dose of SA for 16h.

1512
